1 **Phosphoproteomics after nitrate treatments reveal an important role**  
2 **for PIN2 phosphorylation in control of root system architecture.**

3 Andrea Vega<sup>1</sup>, Isabel Fredes<sup>1</sup>, José O'Brien<sup>1,2</sup>, Zhouxin Shen<sup>3</sup>, Krisztina Ötvös<sup>4,5</sup>, Eva Benkova<sup>4</sup>,  
4 Steven P. Briggs<sup>3</sup> and Rodrigo A. Gutiérrez<sup>1,\*</sup>

5 <sup>1</sup> Departamento de Genética Molecular y Microbiología, Pontificia Universidad Católica de Chile,  
6 Avda. Libertador Bernardo O'Higgins 340, Santiago, Chile. FONDAP Center for Genome  
7 Regulation. Millennium Institute for Integrative Biology (iBio), Santiago, Chile.

8 <sup>2</sup> Departamento de Fruticultura y Enología, Pontificia Universidad Católica de Chile, Avda.  
9 Vicuña Mackenna 4860, Santiago, Chile.

10 <sup>3</sup> Cell and Developmental Biology. University of California San Diego. San Diego, CA. United  
11 States of America.

12 <sup>4</sup> Institute of Science and Technology (IST) Austria, 3400 Klosterneuburg, Austria.

13 <sup>5</sup> Bioresources Unit, Center for Health & Bioresources, AIT Austrian Institute of Technology  
14 GmbH, 3430 Tulln, Austria.

15 \* To whom correspondence should be addressed: [rgutierrez@bio.puc.cl](mailto:rgutierrez@bio.puc.cl)

16

17 **Abstract**

18 Nitrate is an important signaling molecule that commands genome-wide gene expression changes  
19 that impact metabolism, physiology, plant growth and development. Although gene expression  
20 responses to nitrate at the mRNA level have been characterized in great detail, the impact of nitrate  
21 signaling at the proteome level has been much less explored. Most signaling pathways involve  
22 post-translational modifications of key protein factors and chiefly among these modifications is  
23 protein phosphorylation. In an effort to identify new components involved in nitrate responses in  
24 plants, we performed analyses of the *Arabidopsis thaliana* root phosphoproteome in response to  
25 nitrate treatments via liquid chromatography coupled to tandem mass spectrometry. We identified  
26 268 phosphoproteins that show significant changes at 5 min or 20 min after nitrate treatments. The  
27 large majority of these proteins (96%) are coded by genes that are not modulated at the expression  
28 level in response to nitrate treatments in publicly available transcriptome data. Proteins identified  
29 by 5 min include potential signaling-components such as kinases or transcription factors. In  
30 contrast, by 20 min, proteins identified were associated with protein binding, transporter activity  
31 or hormone metabolism functions. Interestingly, the phosphorylation profile of *NITRATE*  
32 *TRANSPORTER 1.1* (*NRT1.1*) mutant plants in response to nitrate at 5 min was significantly  
33 different (95%) as compared to wild-type plants. This result is consistent with the role of NRT1.1  
34 as a key component of a nitrate signaling pathway that involves phosphoproteomic changes. Our  
35 integrative bioinformatics analysis highlights auxin transport as an important mechanism  
36 modulated by nitrate signaling at the post-translational level. We experimentally validated the role  
37 of PIN2 phosphorylation in both primary and lateral root growth responses to nitrate. Our data  
38 provide new insights into the phosphoproteome and identifies novel protein components that are  
39 regulated post-translationally, such as PIN2, in nitrate responses in *Arabidopsis thaliana* roots.

40

## 41 Introduction

42 Nitrogen (N) is the mineral nutrient required in the greatest amounts by plants. N is often  
43 scarce in natural and agricultural systems, constituting a major factor limiting plant growth and  
44 agricultural yield. During the last 50 years, global demand for synthetic N fertilizers has  
45 dramatically increased in response to growing agricultural demand. Depending on soil conditions  
46 and plant species, less than 50% of the applied N fertilizer is taken up by crops. Excess N may  
47 contaminate aquatic systems<sup>1</sup> or be released into the atmosphere as N-oxide gases<sup>2,3</sup>, both leading  
48 to detrimental effects on the environment and human health.

49 The relevance of N for plants is exemplified by its effects on leaf growth<sup>4</sup>, senescence<sup>5</sup>,  
50 root system architecture<sup>6,7</sup>, and flowering time<sup>8,9</sup>. Due to its importance, plants have evolved  
51 sophisticated mechanisms to adapt to fluctuating N availability. Furthermore, growth and  
52 developmental processes can be regulated by varying the amount of N supplied to plants. For  
53 instance, exogenous nitrate applications stimulate lateral root elongation, enabling root growth and  
54 colonization in nitrate-rich soil patches<sup>10,11</sup>. However, high nitrate concentrations reduce primary  
55 and lateral root elongation under homogeneous growth-conditions<sup>12</sup>. Nitrate is the main form of  
56 inorganic N for plants in natural and agricultural soils<sup>13,14</sup>. Besides its nutritional role, nitrate acts  
57 as a signaling molecule that regulates several genes involved in a wide range of biological  
58 processes<sup>15,16</sup>. With advances in genomic technologies and system approaches, thousands of  
59 nitrate-responsive genes have been identified in *Arabidopsis thaliana* roots and shoots<sup>17-24</sup>. These  
60 N-response genes include nitrate transporters, nitrate reductase (NR) and nitrite reductase (NiR),  
61 putative transcription factors, and stress response genes, as well as genes whose products play roles  
62 in glycolysis, N metabolism, and hormone pathways. Moreover, nitrate elicits local and systemic  
63 signals to synchronize its availability with plant growth and development<sup>25-29</sup>. Although  
64 transcriptional responses activated by nitrate have been described in great detail, it is clear that  
65 regulation at the post-translational level is key for N-responses<sup>30,31</sup>.

66 The role of protein phosphorylation in response to nitrate was initially identified in post-  
67 translational modifications in N metabolism. The activity of NR, the enzyme that catalyzes the  
68 first step of nitrate reduction, is modulated by protein phosphorylation and then inhibited by 14-3-  
69 3 protein interaction<sup>32,33</sup>. Studies in spinach leaves using <sup>32</sup>P labeling and kinase assays  
70 demonstrated that the regulation of NR by light/dark and photosynthetic activity involves protein

71 phosphorylation<sup>34,35</sup>. A subsequent study showed that a 14-3-3 family protein interacts with and  
72 inactivates phosphorylated NR in the presence of covalent ions<sup>32,36</sup>. Earlier experiments also  
73 indicated that changes in gene expression in response to nitrate treatments require kinase and  
74 phosphatase activities. In maize leaves for example, treatments with inhibitors of calmodulin-  
75 dependent protein kinases repress nitrate induction of genes encoding nitrate assimilatory enzymes  
76 such as NR, NiR, glutamine synthetase 2 (GS2) and ferredoxin glutamate synthase (Fd-  
77 GOGAT)<sup>37</sup>. Conversely, inhibition of protein phosphatases blocked the nitrate-response of NR,  
78 NiR and GS2<sup>37</sup>. In another study, pharmacological inhibitors of serine-threonine protein  
79 phosphatase and tyrosine protein kinases repressed the nitrate-induced accumulation of transcripts  
80 for NR and NiR in barley leaves<sup>38</sup>. These early experiments suggested that changes in the status  
81 of protein phosphorylation were important for the regulation of gene expression in response to  
82 nitrate treatments.

83 The discovery that a kinase protein complex can directly phosphorylate the nitrate  
84 transceptor NRT1.1/NPF6.3 demonstrated that phosphorylation plays an important role in nitrate  
85 signaling. Under low-nitrate conditions, NRT1.1/NPF6.3 is phosphorylated in a threonine residue  
86 (T101) by CIPK23-CBL9 complex (CIPK, CLB-interacting protein kinase; CBL, Calcineurin B-  
87 like protein), shifting into a high-affinity nitrate transporter<sup>31,39</sup>. In contrast, at high-nitrate levels,  
88 NRT1.1/NPF6.3 is dephosphorylated at T101 and turns into a low-affinity transporter.  
89 Experiments with a mutant mimicking the phosphorylated form of the transceptor showed the  
90 importance of this phosphorylation for the regulation of gene expression at low nitrate  
91 concentrations<sup>39</sup>. Phosphorylation of NRT1.1/NPF6.3 also appears to play a role in the modulation  
92 of auxin transport and repression of lateral root emergence under low-nitrate conditions<sup>40,41</sup>.  
93 Conversely, the dephosphorylated form of NRT1.1/NPF6.3 is critical for up-regulation of  
94 *NITRATE TRANSPORTER 2.1* (*NRT2.1*) gene expression in response to nitrate<sup>39,40</sup>. Bouguyon *et*  
95 *al.* (2015)<sup>40</sup> studied different mutant alleles of NRT1.1/NPF6.3 (T101D, T101A and P492L  
96 substitution), and proposed a different NRT1.1/NPF6.3-dependent signaling mechanism. The  
97 short-term induction of *NRT2.1* at high nitrate is negatively affected by T101D substitutions but  
98 not by P492L and T101A. Long-term regulation of *NRT2.1* transcripts at high nitrate and  
99 repression of lateral root emergence at low nitrate showed an opposite pattern, where signaling  
100 was suppressed by both T101A and P492L mutations but not affected by T101 substitution.  
101 Another kinase involved in signaling is CIPK<sup>842</sup>. In *cipk8* mutants, the rapid induction of genes or

102 primary nitrate response was strongly reduced (40-65% of WT levels), particularly in the low-  
103 affinity phase<sup>42</sup>. Both CIPK8 and CIPK23 are rapidly induced by nitrate treatments and  
104 downregulated in the *chl1-5* and *chl1-9* mutants, respectively<sup>39,42</sup>. More recently, the calcium  
105 sensor CBL1 and the protein phosphatase 2C (ABA-insensitive) ABI2 were also identified as  
106 components of this signaling pathway, which regulates NRT1.1/NPF6.3 transport and sensing<sup>43</sup>.  
107 The calcium sensor CBL1 also interacts with CIPK23 and this complex was dephosphorylated by  
108 ABI2<sup>43</sup>.

109 In higher plants, CBL/CIPK complexes sense and decode Ca<sup>2+</sup> signals, triggering specific  
110 transduction pathways (reviewed by <sup>44</sup>). Recent studies have shown that Ca<sup>2+</sup> plays a role in nitrate  
111 signaling transduction and is important for the primary nitrate response in *Arabidopsis* roots<sup>45</sup>.  
112 Calcium is a key secondary messenger that triggers changes in signaling pathways, including  
113 changes in phosphorylation levels<sup>46,47</sup>. More recently, results published by Liu et al. (2017)<sup>30</sup> have  
114 contributed to our understanding of the relationship between Ca<sup>2+</sup> signaling and the first layer of  
115 transcriptional regulators. They used the luciferase (LUC) reporter gene NIR-LUC, which exhibits  
116 a physiological nitrate response in transgenic *Arabidopsis* plants, to identify three CPKs (CPK10,  
117 CPK30, and CPK32) that activated the NIR-LUC reporter in an effective and synergistic manner.  
118 Additionally, CPK10, CPK30, and CPK32 phosphorylated the transcription factor NIN-LIKE  
119 PROTEIN 7 (NLP7) in a Ca<sup>2+</sup> dependent manner<sup>30</sup>, suggesting that CPK-NLP signaling is a key  
120 regulator of primary nitrate responses<sup>48</sup>. All these studies provide evidence that NRT1.1/NPF6.3,  
121 calcium and phosphorylation of target proteins are key elements of a signaling pathway involved  
122 in the nitrate response.

123 Global-scale proteomic analysis performed in *Arabidopsis* seedlings, mostly shoot organs,  
124 showed that nitrogen starvation and resupply (nitrate or ammonium) modulates protein  
125 phosphorylation over a time course of 30 min<sup>49</sup>. In general, proteins such as receptor kinases and  
126 transcription factors change their phosphorylation levels after nitrogen resupply at 5-10 min (fast  
127 response). Proteins involved in protein synthesis and degradation, central and hormone metabolism  
128 showed changes in their phosphorylation level after 10 min (late response). Another study showed  
129 that nitrate deprivation affects both protein abundance and phosphorylation status<sup>50</sup>. Nitrate  
130 deprivation assays revealed that some proteins, mostly involved in transport, contain sites that are  
131 dephosphorylated early in the response <sup>50</sup>.

132 In this study, we performed quantitative time-course analyses of the *Arabidopsis* root  
133 phosphoproteome in response to nitrate via liquid chromatography coupled to tandem mass  
134 spectrometry detection (HPLC-MS/MS). We chose to focus on root-phosphoproteomics profiling  
135 in response to nitrate for several reasons: (i) phosphoproteomics and proteomics studies describe  
136 phosphorylation levels as more dynamic and mainly independent of protein abundance<sup>51–53</sup>,  
137 suggesting that many proteins are regulated by phosphorylation independent of their changes in  
138 protein abundance. (ii) Previous global studies of N treatment focused on the proteome and  
139 phosphoproteome in *Arabidopsis* seedlings, which interrogates mostly shoot tissues<sup>49,50</sup>. In order  
140 to search for new N-regulatory factors, our experimental approach focused on *Arabidopsis* roots  
141 because early sensing and responses to N-supply occur in the roots. Several studies have shown  
142 that HPLC-MS/MS provides accurate estimates of dynamic phosphorylation levels *in vivo*<sup>54–57</sup>.

143 We used HPLC-MS/MS to identify phosphorylated proteins with differential profiles in  
144 response to nitrate treatments at 0, 5 or 20 min. We found that the nature of these phosphorylated  
145 proteins differed significantly from those encoded by genes implicated in nitrate via transcriptomic  
146 studies. We found different types of phosphoproteins changing at 5 or 20 min after nitrate  
147 treatments. Interestingly, the large majority of these changes depend on NRT1.1/NPF6.3. Kinases  
148 and transcription factors were over-represented at 5 min, while proteins involved in protein binding  
149 and transporter activity were common by 20 min of nitrate treatments. We found several  
150 phosphoproteins involved in auxin transport, including the auxin efflux-carriers PIN2 and PIN4.  
151 We validated the role of PIN2 and found dephosphorylation of PIN2 to be important for  
152 modulation of root system architecture in response to nitrate. Our analysis reveals that the nitrate  
153 signaling pathway mediated by NRT1.1/NPF6.3 leads to important changes in protein  
154 phosphorylation patterns and proposes new players that participate in the developmental responses  
155 to nitrate in plants.

## 156 **Results**

### 157 **Phosphoproteome analysis of *Arabidopsis* roots in response to nitrate treatments.**

158 In an effort to identify new components involved in nitrate responses in plants, we  
159 performed large-scale mass spectrometry-based phosphoproteome experiments following nitrate  
160 treatments in *Arabidopsis* roots. *A. thaliana* (*L.*) *Columbia-0* (Col-0) seedlings were grown  
161 hydroponically, with a full nutrient solution (Murashige and Skoog basal medium without N)  
162 containing 1 mM ammonium as the only N source for 14 days (time 0, see experimental  
163 procedures). Two-week-old plants were treated with 5 mM KNO<sub>3</sub> or KCl, as control. We and other  
164 laboratories have used this experimental setup in prior studies because it elicits robust primary  
165 nitrate responses in *Arabidopsis* plants<sup>7,16,45,58,59</sup>. A label-free high-performance liquid  
166 chromatography-tandem mass spectrometry (HPLC-MS/MS) method was used to identify changes  
167 in protein phosphorylation at 0, 5 or 20 minutes after nitrate treatments. We chose these time points  
168 because they have shown to be effective in describing transient and persistent protein  
169 phosphorylation responses<sup>49,55</sup>. Moreover, this experimental design allows for comparison with  
170 transcriptomics data obtained using the same experimental conditions<sup>7,45,58</sup>. For phosphoproteome  
171 analysis, we used a previously validated experimental pipeline<sup>52,53,60</sup>. Briefly, phosphopeptides  
172 were enriched using cerium oxide affinity capture and analyzed with a HPLC-MS/MS instrument  
173 (Figure S1). The spectra were assigned to specific peptide sequences by the MASCOT search  
174 engine (FDR < 0.1%). We quantified the relative abundance of each phosphoprotein using average  
175 normalized spectral counts (SPCs) of the total number of spectral-peptide matches to protein  
176 sequences in three independent biological replicates for each treatment condition. In total, we  
177 identified and measured 6,560 unique phosphopeptides which unambiguously mapped to 2,048  
178 phosphoprotein groups (Supplemental Table S1). The majority of identified phosphopeptides  
179 (82%) were phosphorylated in a single residue (Figure S2A). The relative distribution of each  
180 phosphorylated residue – 80% serine, 18% threonine, and 2% tyrosine (Figure S2B) – was  
181 consistent with prior plant phosphoproteomic studies<sup>50,54,61</sup>. The identified phosphopeptides were  
182 mapped and grouped in phosphoprotein groups, where proteins that shared peptides were clustered  
183 together. A group leader was assigned to each group, based on having the highest number of  
184 peptide identifications; throughout the remainder of the article, “phosphoproteins” is synonymous  
185 with “group leaders”. The majority of the identified phosphoproteins present one (50%), two  
186 (25%) or three (12%) phosphorylated peptides (Figure S2C) with similar distributions of

187 phosphorylated residue (69% Ser, 28% Thr and 3% Tyr; Figure S2D). We recognized  
188 phosphoproteins across several biological process, subcellular compartments and cellular  
189 functions based on the Gene Ontology (GO) classification (Figure S3). No overrepresented GO  
190 categories were observed when comparing against the *Arabidopsis* genome, showing that our  
191 experimental strategy was unbiased with regards to annotated protein functions, subcellular  
192 locations or biological processes and represents an unbiased *Arabidopsis* proteome sampling.

193 To identify nitrate-regulated phosphoproteins in *Arabidopsis* roots we performed  
194 statistical analysis using analysis of variance (significance:  $p < 0.05$ ). We identified 268  
195 phosphoproteins that were significantly altered under our experimental conditions. We found 62  
196 phosphoproteins regulated at 5 min after nitrate treatments, 40 of which were induced (Figure 1A).  
197 We found 152 phosphoproteins differentially regulated at 20 min, 113 of which were induced by  
198 the nitrate treatments. The large majority of phosphoproteins were found to be nitrate-regulated at  
199 only one time-point, indicating that most changes in the phosphoproteome are transient with an  
200 early (5 min) and late (20 min) component in response to nitrate treatments. Two previous studies  
201 characterized the phosphoproteome in response to nitrate-depletion<sup>49</sup> or nitrate-resupply<sup>50</sup> (Figure  
202 1C). Response to nitrate-resupply resulted in 10 common phosphoproteins and nitrate-deprivation  
203 in 6 common proteins. These proteins were mostly associated with nitrate metabolism, such as  
204 transporters (NRT2.1; ammonium transporter 1.3, AMT1.3), the *Arabidopsis* H<sup>+</sup>-ATPase 2  
205 (AHA2) proton pump, and nitrate reductase 2 (NIA2). The comparison of the phosphoproteins  
206 identified here with transcriptome data revealed that 96% of the phosphoproteins are encoded by  
207 genes that do not change expression at the mRNA level (Figure S4). We compared our results with  
208 an integrated analysis of available root microarray data under contrasting nitrate conditions (27  
209 experimental datasets corresponding to 131 arrays<sup>62</sup>). This study identified a group of 2286 nitrate-  
210 responsive genes regulated at transcription levels. Only 11 of these genes were found in our  
211 phosphoproteomic dataset.

212 Our approach identified new genes coding for phosphoproteins putatively involved in  
213 nitrate responses. Changes in phosphorylation patterns improve our understanding of signaling  
214 mechanisms that connect nitrate transporters/sensors with transcriptomic response and other  
215 biological processes. The small overlap between the phosphoproteomic studies to date highlights  
216 the importance of ours and additional future studies to address this important aspect of  
217 posttranslational modifications in response to N-signals in plants.



218 **Functional enrichment in the phosphoproteome reveals distinctive signaling and regulatory**  
219 **processes occurring in early and late responses to nitrate.**

220 To evaluate the biological significance of the phosphoproteome patterns observed in  
221 response to nitrate, hierarchical clustering analysis was performed on the phosphoprotein dataset  
222 at 5 and 20 min following nitrate treatments in Col-0 roots (Figure 2). In order to identify the most  
223 prominent functional categories affected, we searched for overrepresented biological terms in each  
224 cluster using the BioMaps program<sup>63</sup> and the PANTHER classification system<sup>64,65</sup> (significance:  
225  $p < 0.05$ , corrected by FDR). This analysis highlighted several signaling, regulatory or metabolic  
226 functions differentially associated with early (5 min) and late (20 min) components in response to  
227 nitrate treatments. “DNA binding” and “Nucleic acid binding” categories were overrepresented in  
228 cluster 6, containing phosphoproteins that increase their levels at 5 min and do not change at 20  
229 min. This cluster also includes previously undescribed transcription factors (TFs) in the N-  
230 response cascade in diverse transcriptomic studies<sup>21–24,66</sup>. In contrast, cluster groups containing  
231 mostly phosphoproteins that changed their levels at 20 min in response to nitrate were enriched in  
232 the functional categories: “transport” and “nitrogen compounds metabolism” (clusters 2 and 8).  
233 Consistent with this, increases in phosphoprotein levels in response to nitrate were observed in  
234 NRT2.1, the lysine–histidine-like transporter 4 (LHT4), the UDP-Arabinofuranose Transporter 4,  
235 AMT1-3 and the K<sup>+</sup>-transporter 8 (KUP8) only at 20 min following nitrate treatment. Increased  
236 abundance of the phospho-peptide Ser-501, corresponding to NRT2.1, was observed at 20 min  
237 after nitrate treatment. This site is localized in a C-terminal phosphorylation hotspot  
238 (Phosphorylation site database and predictor Phosphat4.0<sup>67,68</sup>) and was also identified in nitrate-  
239 deprivation experiments with an opposite phosphorylation response<sup>50</sup>. Also, phosphopeptides for  
240 AMT1.3 with phosphorylation at Thr-464 and Ser-487 were identified as “up-regulated” by nitrate  
241 treatments at 20 min. The phosphorylation of both sites inhibits transport function<sup>69</sup> and were also  
242 identified as phosphopeptides in nitrate deprivation<sup>50</sup> and resupply<sup>49</sup> experiments. We also found  
243 that nitrate strongly increased levels of phosphorylated nitrate reductase NIA2 at the highly  
244 conserved and regulatory site Ser-534<sup>70</sup>. These results are consistent with previous studies and  
245 suggest overall regulation of N metabolism by phosphorylation of key players by 20 min after  
246 nitrate treatments.

247 The final group of clusters showed enrichment in signaling and regulatory pathways, with  
248 different profiles at 5 min and 20 min. Clusters 1, 5, and 7, contained phosphoproteins with  
249 opposite regulation at 5 and 20 min, and showed proteins related to microRNA processing,  
250 phosphoinositide and phosphatidylinositol binding functions. Phosphoinositides can act in  
251 signaling pathways and serve as precursors for phospholipase C (PLC)-mediated signaling. A  
252 previous study in our laboratory implicated a PLC-activity in the nitrate signaling pathway<sup>45</sup>. Our  
253 results are consistent with these results and show that PLC2, represented by the phosphopeptide  
254 Ser-280, was identified as up-regulated in response to nitrate at 20 min (in Cluster 1). Cluster 10  
255 is interesting for nitrate responses because it includes many components involved in classical  
256 processes regulated by nitrate in *Arabidopsis* roots. For instance, auxin and lateral root  
257 development are biological functions enriched in this group, which is consistent with auxin  
258 pathways being modulated by nitrate<sup>16,71</sup>. Several reports indicate that auxin acts as regulator of  
259 root system architecture in response to nitrate availability<sup>7,71,72</sup>.

260 Overall, our dataset captures the dynamic effects of N-signaling on phosphoproteome  
261 profiles, which implicate a cascade of nonoverlapping processes in early and late responses. The  
262 earliest steps in the N phospho-dynamics were involved in signal transduction and transcription  
263 factor activity. In contrast, the later phosphoprotein data-set was enriched in metabolic, transport  
264 and root developmental processes. These temporal mechanisms show a transition of  
265 phosphorylation dynamics from phosphoproteins essential to signaling networks to proteins  
266 associated with biological processes involved in nitrate response.

## 267 **NRT1.1/AtNPF6.3 is essential for transient phosphoprotein changes in response to nitrate** 268 **treatments**

269 The only nitrate sensor described to date is the nitrate transporter, NRT1.1/NPF6.3<sup>39,73</sup>. In  
270 order to understand the importance of NRT1.1/NPF6.3 for nitrate elicited changes in the  
271 phosphoproteome observed, we analyzed the phosphoproteomic profile of roots treated with 5 mM  
272 KNO<sub>3</sub> or KCl (control) in a *nrt1.1-null* background (mutant *chl1-5*), using the same experimental  
273 conditions described above. 74% of phosphoproteins were detected in both datasets, yet only 5%  
274 of the nitrate-phosphoproteome response observed in wild-type plants was maintained in the *chl1-*  
275 *5* mutant (Figure 3). Moreover, 95% of phosphoprotein levels were altered in the *chl1-5* mutant  
276 plants. This result indicates that this gene is important for modulating protein phosphorylation in

277 response to nitrate, in addition its established role as nitrate transceptor.

278 Our analysis indicates that NRT1.1/NPF6.3 is critical for maintaining the *Arabidopsis*  
279 phosphoproteome in response to nitrate availability. It also denotes that NRT1.1/NPF6.3 function  
280 is required for rapid changes in phosphorylation of key proteins in response to nitrate in  
281 *Arabidopsis* roots. For example, phosphorylated peptides that map to proteins associated with  
282 nitrogen metabolism (NRT2.1, AMT1-3 and NIA2) were identified in *chl1-5* mutant roots, but  
283 their levels were not affected in response to nitrate.

#### 284 **Network analysis reveals regulatory sub-networks connected to transcription factors and** 285 **potential kinases in response to nitrate.**

286 To uncover key biological processes modulated by changes in phosphorylation, we  
287 performed a multinet network analysis with our phosphoproteomics data. We generated this network  
288 by integrating different levels of information, including protein-protein interactions from  
289 BioGRID<sup>74</sup>, predicted protein-DNA interactions of *Arabidopsis* TFs (DapSeq)<sup>75,76</sup>, *Arabidopsis*  
290 metabolic pathways (KEGG), and miRNA-RNA, as described previously<sup>16</sup>. We also integrated  
291 kinase-substrate predictions and identified the most significant phosphorylation motifs and their  
292 predicted kinase families from our phosphoproteomic datasets using the Motif-X algorithm<sup>77</sup> and  
293 the PhosPhAt Kinase-Target interactions database<sup>78</sup> (Figure S5). We used the Cytoscape<sup>79</sup>  
294 software to visualize the resulting network, wherein genes that encoded each phosphoprotein were  
295 represented as nodes linked by edges that signify any of the functional relationships annotated in  
296 the various databases indicated above. We generated a network of 206 nodes with 700 interactions  
297 (Figure 4A). Although the majority of these genes are not regulated by nitrate at the mRNA level,  
298 they form a highly interconnected network which includes potential regulatory transcription  
299 factors and kinase components. They are connected by multiple edges, including protein-protein,  
300 protein-DNA, and metabolic interactions. This result suggests that the products of these genes  
301 form connected biological modules that are coordinately regulated at the post-translational level.  
302 This network included several TFs with a high number of regulatory links. The most connected  
303 were the Trihelix transcription factor 1 (GTL1), the WRKY DNA-binding protein 65 (WRKY65),  
304 and the RELATED TO VERNALIZATION 1 (RTV1) transcription factors, which had not  
305 previously been characterized in the context of nitrate response. Intriguingly, GTL1 regulates root  
306 hair growth in *Arabidopsis*<sup>80</sup>, which has recently been described as a biological process modulated

307 by nitrate treatments under the same experimental conditions<sup>81</sup>. A previous study indicated that  
308 WRKY65 interacts at the protein level with the mitogen-activated protein kinase 10 (MPK10),  
309 which binds with the lateral organ boundaries domain 16 (LBD16), LBD18, and LBD29  
310 transcription factors<sup>82,83</sup>. These LBDs are inducible by auxin and play a role in the formation of  
311 lateral roots<sup>83</sup>. In addition, MPK10 interacted with other genes involved in the auxin response<sup>82</sup>,  
312 while LBD29 regulated genes involved in auxin transport, including auxin efflux-carriers PIN1  
313 and PIN2<sup>83</sup>. This evidence suggests that WRKY65 could be involved in nitrate–auxin signaling  
314 crosstalk. These three TFs appear to coordinate different subnetworks largely involved in auxin  
315 transport and nitrogen metabolism. Consistent with this observation, analysis of over-represented  
316 gene ontology annotations highlights the importance of auxin transport (Figure 4B). Other over-  
317 represented biological functions in our network were mRNA binding and splicing, regulation of  
318 translation and kinase activity (Figure 4B).

319 Overall, this network analysis highlights a potential role of multiples TFs in linking the N  
320 signal and regulatory nitrate responses that show significant enrichment for key functions in  
321 signaling pathways and validates the important role auxin plays in the nitrate-response of root  
322 system architecture.

### 323 **PIN2 is important for modulation of root system architecture in response to nitrate** 324 **treatments**

325 Auxin is a key phytohormone in plants, involved in growth and developmental responses.  
326 Several reports have shown that auxin mediates root developmental responses to nitrate  
327 availability<sup>7,16,71,72,84–86</sup>. Nitrate can regulate auxin biosynthesis, transport and accumulation. In  
328 response to nitrate, several auxin-related modules are regulated, including the upregulation of  
329 auxin receptor AUXIN SIGNALING F-BOX 3 (AFB3) and the feedback regulation by miR393<sup>7,71</sup>.  
330 This auxin-signaling component in response to nitrate is implicated in both primary and lateral  
331 root growth<sup>7</sup>. Other important evidence comes from the analyses of the *Arabidopsis* transcriptomic  
332 response upon nitrate treatments. They show that several genes involved in auxin transport are  
333 affected, including auxin efflux-carriers PIN1, PIN4 and PIN7<sup>16,71</sup>. Moreover, the nitrate  
334 transceptor NRT1.1/NPF6.3 not only senses and transports nitrate but can also transports auxin, a  
335 process that regulates auxin-localization patterns and lateral-root elongation<sup>84</sup>. Consistent with  
336 these prior observations, auxin transport was conspicuous throughout our entire phosphoproteomic

337 analysis (Figure 2 and 4). PIN phosphorylation has been shown to be essential for auxin transport  
338 and distribution<sup>87-92</sup>. PINs phosphorylation in conserved serine and/or threonine of the central loop  
339 controls intracellular trafficking, recycling and polar membrane localization of PIN proteins  
340 (Review by<sup>87</sup>). Previous studies indicate that PIN polar localization explains auxin fluxes and  
341 distribution patterns, which could mediate differential growth in diverse plant tissue such as  
342 roots<sup>91,93</sup>. To validate the relevance of phosphorylation in auxin transport and its connection with  
343 nitrate response, we chose the auxin efflux-carrier PIN2 (identified in our experimental dataset)  
344 due to its potential role in linking nitrate and changes in root system architecture (RSA). We found  
345 an uncharacterized PIN2 phosphorylation site (Ser439) at the end of the hydrophilic cytoplasmic  
346 loop (C-loop, Figure 5A). Its phosphopeptide levels decreased by close to 75% in response to  
347 nitrate treatments by 5 min (Figure 5B). PIN2 belongs to the PIN-FORMED protein family of  
348 auxin transporters and is the principal component mediating basipetal auxin transport in roots<sup>94,95</sup>.  
349 This polar auxin transport is essential for root gravitropism<sup>95</sup> and lateral root formation<sup>96</sup>.  
350 Intriguingly, we detected only one phosphorylated peptide for PIN2 in response to nitrate. Protein  
351 sequence alignment indicated that this phosphosite is highly conserved in different plant species  
352 representing gymnosperm, mono- and dicotyledonous plant lineages of seed plants (Figure 5A).  
353 This phosphopeptide has also been described as down-regulated after auxin treatment but its  
354 function remains an open question<sup>57</sup>.

355 As a first step to understand the function of PIN2 phosphorylation in the nitrate response,  
356 we performed a Phos-tag Western Blot analysis to confirm the changes in PIN2 phosphorylation  
357 after nitrate treatment. We detected two, fast- and slow-mobility, PIN2 specific bands indicating  
358 the presence of two phospho-populations in response to nitrate: one more and another less  
359 phosphorylated PIN2. In contrast, only one slow-mobility band corresponding to the more  
360 phosphorylated PIN2 subpopulation could be observed at time 0 (ammonium-supplied roots) or  
361 under control conditions (KCl-treated roots) (Figure 5C). To assess whether these changes in PIN2  
362 phosphorylation status are a result of a change in protein abundance, we analyzed PIN2-GFP  
363 protein levels by Western Blot under our experimental conditions. We introgressed the construct  
364 *PIN2::PIN2-GFP* (*PIN2<sup>wt</sup>-GFP*) into the *pin2* loss-of-function mutant plant *eir1-1*<sup>97</sup>. No  
365 differences in protein levels were observed in roots treated with nitrate as compared to roots at  
366 time 0 (Figure 5D). To understand the function of this specific PIN2 phosphosite Ser439, we also  
367 analyzed the protein levels in *pin2* null mutant complemented with phospho-null

368 (*PIN2::PIN2<sup>S439A</sup>-GFP*) or phospho-mimic (*PIN2::PIN2<sup>S439D</sup>-GFP*) versions of PIN2-GFP.  
369 Similarly, PIN2 protein concentrations were similar when our experimental conditions mimicked  
370 PIN2 phospho-modifications (Figure 5D). Moreover, no regulation at the mRNA level was  
371 observed in *PIN2* during nitrate responses (Figure 5E). These results demonstrated that nitrate  
372 regulates PIN2 at the posttranslational level, causing de-phosphorylation of PIN2 at a specific  
373 phosphosite.

374 Next, we evaluated the role of PIN2 in root system architecture (RSA) in response to nitrate  
375 treatments. We grew wild-type (Col-0) and *pin2* mutant (*eir1-1*) plants for 2 weeks on ammonium  
376 as sole N source (time 0) and evaluated RSA after nitrate treatments. We measured primary root  
377 length 3 days after 5 mM KNO<sub>3</sub> or KCl treatments. As expected for this experimental set up, we  
378 found that nitrate-treated wild-type plants developed shorter primary roots as compared to KCl-  
379 treated plants, consistent with earlier results indicating that nitrate treatments inhibit primary root  
380 elongation under these experimental conditions<sup>7</sup> (Figure 6A). However, primary roots of *eir1-1*  
381 plants were not significantly inhibited by nitrate treatments as compared to wild-type plants. We  
382 also analyzed the density of lateral roots in response to nitrate treatments. In wild-type plants,  
383 nitrate treatments increased the number of lateral roots (emerged and initiating) as compared with  
384 KCl treatments (Figure 6B). In contrast, the lateral root response to nitrate treatment was altered  
385 in the *eir1-1* mutant and the density of lateral roots was significantly reduced as compared with  
386 wild-type plants (Figure 6B). These results show that PIN2 plays an important role in modulating  
387 RSA in response to nitrate treatments.

388

### 389 **PIN2 de-phosphorylation of Ser439 plays a role in modulating the root system architecture** 390 **in response to nitrate treatments.**

391 To understand the function of the PIN2 phosphosite identified in this study, we analyzed  
392 the *pin2* null mutant *eir1-1* complemented with phospho-null (S439A) or phospho-mimic (S439D)  
393 versions of PIN2-GFP. As PIN2 plays an important role in root gravitropism, we evaluated the  
394 gravitropic curvature in wild-type, *eir1-1* mutant plants and PIN2-GFP transgenic plants. All  
395 seedlings were germinated and grown in MS media in the absence of nitrate for 7 days, and then  
396 they were transferred to agar plates with or without nitrate. Agar plates were rotated 90° and root  
397 curvature was measured at 24 hours. As expected, *pin2* mutant plants showed an agravitropic

398 phenotype. Both *PIN2<sup>S439D</sup>-GFP* and *PIN2<sup>S439A</sup>-GFP* were able to rescue the agravitropic  
399 phenotype of *eir1-1* mutant plants. This result indicates that the phosphorylation status of PIN2 at  
400 S439 is not relevant for root gravitropic responses in *Arabidopsis* (Figure S6). This result also  
401 indicates that phosphorylation at S439 does not impair all PIN2 functions.

402 Next, we evaluated the RSA in response to nitrate treatments in the same phospho-  
403 mimicking (*PIN2<sup>S439D</sup>-GFP*) or -null (*PIN2<sup>S439A</sup>-GFP*) genotypes and compared it to wild-type  
404 plants. Plants were grown for 2 weeks on ammonium as sole N source and then treated with 5 mM  
405 KNO<sub>3</sub> or KCl for three days. Complementation of the *eir1-1* mutant with a wild-type version of  
406 PIN2 (*PIN2<sup>wt</sup>*) restored normal RSA responses to nitrate (Figure 7). *eir1-1* mutant plants  
407 complemented with *PIN2<sup>S439A</sup>* showed RSA changes similar to wild-type plants in response to  
408 nitrate treatments, albeit slightly less pronounced. Three days after nitrate treatments, primary root  
409 growth was inhibited 42% by nitrate in the *PIN2<sup>S439A</sup>-GFP* genotype as compared with nitrate-  
410 treated wild-type plants (Figure 7A). Similarly, lateral root density in *PIN2<sup>S439A</sup>-GFP* plants  
411 increased 47% as compared to wild-type plants in response to nitrate treatments (Figure 7B). In  
412 contrast at the end of the 3-day treatment, the primary root length and lateral root density did not  
413 differ between nitrate or KCl treatment in *eir1-1* mutant plants complemented with *PIN2<sup>S439D</sup>-*  
414 *GFP*. This result, comparable to the response in *eir1-1* roots, indicates that regulation of PIN2  
415 phosphorylation status at S439 is necessary for normal RSA modulation in response to nitrate  
416 treatments.

417

#### 418 **PIN2 phosphosite regulates polar plasma membrane localization in response to nitrate.**

419 To explore the impact of nitrate-regulated phosphorylation of PIN2 on cellular localization,  
420 we examined the subcellular localization pattern in PIN2-GFP genotypes with phosphosite  
421 substitutions. PIN2<sup>WT</sup>-GFP proteins were accumulated at the plasma membrane of epidermal and  
422 cortical cells, as previously described (Figure 8A)<sup>86</sup>. PIN2<sup>WT</sup>-GFP fluorescence signal increased  
423 in epidermal and cortical cells 2 hours after nitrate treatments as compared to roots in control  
424 conditions (roots without nitrate treatments, Figure 8A). Interestingly, mutations at S439 altered  
425 this pattern. PIN2<sup>S439A</sup>-GFP plants showed higher fluorescence in the plasma membrane even  
426 without nitrate treatment as compared to PIN2<sup>wt</sup>-GFP or PIN2<sup>S439D</sup>-GFP (Figure 8A). The total  
427 fluorescence in all experimental conditions analyzed here was similar (Figure 8B). In response to

428 nitrate, PIN2<sup>WT</sup>-GFP and PIN2<sup>S439A</sup>-GFP were accumulated at the plasma membrane of epidermal  
429 and cortical cells at comparable levels (Figure 8C and 8D). On the contrary, PIN2<sup>S439D</sup>-GFP plants  
430 showed lower levels at epidermal and cortical cells in response to nitrate treatments as compared  
431 to PIN2<sup>WT</sup>-GFP or PIN2<sup>S439A</sup>-GFP (Figure 8C and 8D).

432           These results indicate that PIN2 phosphorylation status at S439 is important for a correct  
433 subcellular localization-pattern in response to nitrate treatments. Moreover, these results indicate  
434 that post-translational control impinging upon PIN2 localization is required for RSA changes in  
435 response to nitrate treatments.

436



## 437 Discussion

438 A key plant nutrient, N also acts as a signal that regulates a myriad of plant growth and  
439 developmental processes. Nitrate, a main N-source in natural and agriculture soils, elicits genome-  
440 wide changes in gene expression for thousands of genes involved in various biological functions.  
441 Nitrate responses have been characterized in great detail at the transcriptome level. However, post-  
442 translational modifications have not been characterized in detail. In this study, we evaluated  
443 phosphoproteomic profiles in *Arabidopsis* roots in response to nitrate treatments. We focused on  
444 characterizing early nitrate-elicited changes in protein phosphorylation. Protein phosphorylation  
445 and dephosphorylation plays a central role in modulating protein function in plant signaling-  
446 pathways involved in a wide range of processes relating to hormones, nutrients, and responses to  
447 stress<sup>54-57,61,98</sup>.

448 Our analysis demonstrated that early and late changes in phosphoprotein levels occur in  
449 response to nitrate in roots. Furthermore, we identified candidates for nitrate-signaling and  
450 biological functions underlying the nitrate response in roots. Interestingly, the majority of proteins  
451 and corresponding genes identified in our analysis have not been previously associated with nitrate  
452 responses. The phosphoproteomic profile was characteristic of each time-point, showing dynamic  
453 changes in phosphorylation patterns in response to nitrate treatments. Early changes in  
454 phosphorylation levels (5 min) mainly affected proteins associated with gene regulation, including  
455 transcription factors and splicing process. These results are consistent with rapid and dynamic N-  
456 responses observed at the mRNA level described in previous studies<sup>21-23,71</sup>. Recent studies have  
457 identified new transcription factors<sup>21-23</sup> involved in the control of gene expression by nitrate.  
458 Interestingly, the majority of the transcription factors that we detected as differentially  
459 phosphorylated had not been identified as part of the nitrate response. The phosphoproteomic  
460 response to nitrate at 20 min revealed a group of different phosphoproteins, mostly involved in  
461 protein binding and transport. In this dataset, we found proteins known to be involved in nitrogen  
462 response as differentially phosphorylated, including the high-affinity nitrate transporter  
463 NRT2.1<sup>49,50</sup> and AMT1.3<sup>69</sup>. In our experimental conditions, site T464 in AMT1.3 was  
464 phosphorylated. Since phosphorylation of this site inhibits ammonium transport<sup>69</sup>, the increased  
465 phosphorylation status at this site may be related to the fact that our experimental conditions  
466 focused on nitrate transport in *Arabidopsis* roots. We also identified phosphoproteins associated  
467 with signaling pathways and transcription factors, uncovering regulatory networks linked to

468 transcriptomic changes occurring later in the response to nitrate. The corresponding genes have  
469 not been characterized in the context of nitrate responses. For instance, one potentially novel  
470 regulatory factor is ABA-responsive element binding protein 3 (AREB 3), whose phosphoprotein  
471 levels are increased in response to nitrate treatments. This transcription factor is involved in ABA  
472 signaling<sup>99,100</sup>. Nitrate triggers ABA accumulation at the root tip<sup>101</sup> and several studies indicate  
473 that ABA plays a role in regulation of lateral root growth by nitrate<sup>102</sup>.

474 NRT1.1/NPF6.3 is the main nitrate sensor described to date<sup>31,39</sup>. Interestingly, we observed  
475 important differences in the phosphoproteome of *chl1-5* mutant as compared to wild-type plants  
476 in response to nitrate treatments. These results emphasize that NRT1.1/NPF6.3, calcium and  
477 kinases/phosphatases make-up the canonical nitrate-signaling pathway of *Arabidopsis* roots.  
478 Recent evidence showed that NRT1.1/NPF6.3 and PLC activity are required for nitrate-induced  
479 increases in cytoplasmic Ca<sup>2+</sup> levels<sup>45</sup>. Our results indicated that PLC2 phosphoprotein levels  
480 increased in response to nitrate. Nitrate signaling pathways also involve CBL–CIPK complex and  
481 CPK–NLP regulatory network (reviewed by <sup>48</sup>).

482 The transcriptomic nitrate-response was not mirrored at phosphoproteomic levels. This  
483 lack of correlation between mRNA and protein or phosphoprotein levels has been documented in  
484 other nitrogen-phosphoproteomic studies<sup>49,50</sup>, plant responses to different stimulus<sup>52,53</sup> and other  
485 organisms<sup>103</sup>. Furthermore, post-translational regulation does not require a change in gene  
486 expression or *de novo* protein synthesis. Post-translational control is faster, allowing rapid  
487 adaptation to environmental changes. Interestingly, the genes coding for nitrate-modulated  
488 phosphoproteins identified in this study are highly co-expressed across many different  
489 experimental conditions but not regulated by nitrate treatments<sup>104</sup>. This finding suggests that this  
490 group of genes is functionally related and regulated at the mRNA level in response to several  
491 endogenous or exogenous cues. In the context of nitrate responses, the products of these genes are  
492 regulated at the post-translational level, uncovering a new layer of control that enables signal  
493 crosstalk and fine tuning. Our results highlight the need for integrated analysis and data sets at  
494 different levels to decipher plant responses to environmental cues.

495 It is now clear that auxin plays a central role in the plant root response to changes in nitrate  
496 availability. Nitrate regulates primary root growth, lateral root initiation and elongation. Auxin in  
497 turn is key during root development<sup>96</sup>, particularly in initiation and growth of lateral roots<sup>93</sup>.

498 Several reports show that auxin signaling, biosynthesis, transport, and accumulation are affected  
499 during nitrate responses<sup>72,84</sup>, and transcriptomic analyses demonstrate that genes involved in auxin  
500 response are controlled by nitrate<sup>7,16,71</sup>. The main nitrate transporter NRT1.1/NPF6.3 can also  
501 transport auxin<sup>84,86</sup>. A recent study also showed that NRT1.1/NPF6.3 negatively regulates the  
502 *TAR2* auxin-biosynthetic gene and the *LAX3* auxin-influx transport gene at low nitrate  
503 concentrations, repressing lateral root development<sup>105</sup>. These results suggest that an interplay  
504 between nitrate signaling and auxin transport occurs at different levels<sup>106–108</sup>. Consistent with these  
505 findings, we found that the molecular function “auxin transport” was overrepresented in our cluster  
506 and network analyses. We showed that dephosphorylation of PIN2 in a novel phosphosite is a part  
507 of a regulatory mechanism for RSA responses triggered by nitrate. The  
508 phosphorylation/dephosphorylation of PIN proteins at specific sites (serine or threonine) located  
509 in their higher loops has been shown to play important roles in modulating PIN functions<sup>88,91,92,109</sup>,  
510 including trafficking<sup>110</sup>. We showed that phosphorylation/dephosphorylation of PIN2 at S439 is  
511 important for PIN2 plasma membrane localization in epidermal and cortical cells in response to  
512 nitrate. Previous studies have shown that changes in PIN2 membrane localization and polarity  
513 interfere with PIN2 function in auxin transport with an impact on RSA during alkaline stress<sup>111</sup> or  
514 low phosphate<sup>112</sup>. In addition, recent studies showed that kinase cascade modules 3’-  
515 PHOSPHOINOSITIDE-DEPENDENT PROTEIN KINASE 1 (PKC1)-D6 PROTEIN KINASEs  
516 (D6PK) and PKC1- AGC1 kinase PROTEIN KINASE ASSOCIATED WITH BRX (PAX)  
517 regulate auxin distribution through PIN phosphorylation<sup>113,114</sup>. The phosphorylation of PIN affects  
518 PIN-mediated auxin transport, which controls plant growth<sup>113</sup> and other developmental  
519 processes<sup>114</sup>. These results suggest that PIN phosphorylation is part of a regulatory switch that  
520 strictly controls the directional transport of auxin and subsequent growth or developmental  
521 processes.

522 Our results suggest a model (Figure 9) in which nitrate promotes dephosphorylation of  
523 PIN2, which then impacts localization and auxin transport. Modulation of PIN2 function could  
524 affect growth of primary and lateral roots for optimal nutrient uptake. Beyond this new regulatory  
525 mechanism involving PIN2 protein, our phosphoproteomics results identify novel proteins, which  
526 may be interesting targets for future studies or biotechnological developments for improved  
527 nitrogen use-efficiency or crop yield.

528

529 **Acknowledgements**

530

531 This work was supported by Millennium Institute for Integrative Biology—iBio (Iniciativa  
532 Científica Milenio-MINECON), Fondo de Desarrollo de Areas Prioritarias (FONDAP) Center for  
533 Genome Regulation (15090007), Fondo Nacional de Desarrollo Científico y Tecnológico  
534 (FONDECYT) 1141097 (to RAG) and 1171631 (to AV). We would like to thank Unidad de  
535 Microscopía Avanzada UC (UMA UC).

## 536 **Methods**

537

### 538 **Plant material and growth conditions.**

539 *Arabidopsis thaliana* (L.) Heynh. Columbia-0 accession plants were used as wild type genotype in all  
540 experiments. The transgenic lines *PIN2::PIN2<sup>wt</sup>-GFP*, *PIN2::PIN2<sup>S439D</sup>-GFP* and *PIN2::PIN2<sup>S439A</sup>-GFP*  
541 were introduced into *eir1-1* background (*pin2* null mutant plants), using strategies described previously.  
542 *PIN2* lines were generated by Gibson assembly as described<sup>115</sup> using pGREEN backbone vector<sup>116</sup>.  
543 *PIN2::PIN2<sup>wt</sup>-GFP* line was generated by insertion of *mGFP5* into *PIN2* coding sequence at nucleotide  
544 1215 from ATG (between Thr405 and Arg406)<sup>94,117</sup>. For *PIN2* promoter, 2178 bp upstream of the start  
545 codon was used. For the generations of *PIN2::PIN2<sup>S439D</sup>-GFP* and *PIN2::PIN2<sup>S439A</sup>-GFP* lines Serine 439  
546 was replaced by aspartate (*PIN2<sup>S439D</sup>*) or alanine (*PIN2<sup>S439A</sup>*) by site-directed mutagenesis using Gibson  
547 Assembly.

548

549 Seeds were sterilized using 50% chlorine solution for 7 minutes and washed with sterile distilled water  
550 three times. Then, 1,500 *Arabidopsis* seedlings were placed into a hydroponic system (Phytatrays) with  
551 MS-modified basal salt media without N (Phytotechnology Laboratories, M531) supplemented with 1 mM  
552 ammonium as the only N source. Plants were grown under long-day photoperiods (16h light/ 8h dark and  
553 a temperature of 22 °C) for 14 days using a plant growth incubator (Percival Scientific, Inc.). At day 15,  
554 plants were treated with 5 mM KNO<sub>3</sub> or 5 mM KCl for different time periods as indicated, using a protocol  
555 described previously<sup>7</sup>. For the phenotypic study of root response to nitrate, plants were grown as described  
556 above and were treated with 5 mM KNO<sub>3</sub> or 5 mM KCl for 3 days.

557

### 558 **Root architecture analysis.**

559 For root phenotyping, plants were scanned in plates using an Epson Perfection V700 Photo scanner, and  
560 root length were measured using Fiji (v1.52). Initiating and emerging lateral roots were analyzed using DIC  
561 optics on a Nikon Eclipse 80i microscope, as described<sup>7</sup>. The data were statistically analyzed in the Graph  
562 Pad Prism 5 Program.

563

### 564 **Protein extraction, phosphopeptide enrichment and mass spectrometry analysis.**

565 Proteins were isolated from 1 g of frozen tissue per sample in each experimental condition (2-3 biological  
566 replicates). Sample preparation and protein extraction were performed using previously described  
567 methods<sup>52,53</sup>. Phosphopeptide enrichment was performed using 1% (w/v) colloidal CeO<sub>2</sub> into an acidified  
568 peptide solution at 1:10 (w/w). Mass spectrometry (MS) and peptide identification were based on protocols  
569 described previously<sup>60</sup>. Briefly, the generated spectra were analyzed on LTQ Velos linear ion trap tandem  
570 mass spectrometer (Thermo Electron) and phosphorylation sites were identified into a specific amino acid  
571 within a peptide by using the variable modification localization score in Agilent Spectrum Mill software<sup>118</sup>.  
572 Proteins were grouped based on their shared, common phosphopeptides using principles of parsimony to  
573 address redundancy in proteins. Proteins classified within the same group share the same subset of  
574 phosphopeptides. Phosphoprotein levels were quantified using spectral counting, as described  
575 previously<sup>52,53</sup>. MS data were normalized using the total number of spectral counts (SPC) for each MS run.  
576 Expressed phosphoproteins were defined by at least one SPC, after the application of quality score cutoff  
577 in MS analysis, in minimum two of the tree biological replicates. To identify nitrate-regulated  
578 phosphoproteins in *Arabidopsis* roots, raw data were log transformed and quantile normalized using R  
579 studio (<https://rstudio.com>) and MEV (<http://mev.tm4.org/>) software. The statistical multifactor analysis of  
580 variance (significance:  $p < 0.05$ ) and *pos-hoc* analysis (significance:  $p < 0.1$ ) were performed using R-  
581 studio. Encoded genes for phosphoproteins showing a similar pattern were analyzed and visualized using  
582 the average-linkage hierarchical clustering performed in Cluster 2.11 software, as described<sup>119</sup>.

583

584

585

## 586 **Gene network analysis**

587 *Arabidopsis* encoded genes from our phosphoproteomics data were used. The gene network was generated  
588 by integrating different information, including protein-protein interactions from BioGRID<sup>74</sup>, predicted  
589 protein-DNA interactions of *Arabidopsis* TFs (DapSeq)<sup>75,76</sup>, *Arabidopsis* metabolic pathways (KEGG), and  
590 miRNA-RNA, as described previously<sup>16</sup>. This analysis also included predicted regulatory connections  
591 between phosphoproteins that we detected and kinase families. A kinase-substrate analysis, identifying the  
592 most significant phosphorylation motifs and their predicted kinases were performed using the Motif-X  
593 algorithm<sup>77</sup> and PhosPhAt Kinase-Target interactions database<sup>78,120</sup>. The resulting network was visualized  
594 using CYTOSCAPE software<sup>79</sup>. Cluster and Gene Ontology analysis into the network were achieved with  
595 ClusterMaker<sup>121</sup> and Bingo<sup>121</sup> tools for biological networks in cytoscape, respectively.

## 597 **Phos-Tag PAGE and western immunoblotting**

598 Affinity-based SDS PAGE identification of phosphorylated PIN2 isoforms were performed based on the  
599 protocols by Komis et al.<sup>122</sup> and the protocol given by the Phos-tag manufacturer (FUJIFILM Waco  
600 Chemicals) with slight modifications. *Arabidopsis* seedlings were grown on modified MS plates with  
601 ammonium as the only N source for 7 days. Next, seedlings (n≥40) were transferred to 5 mM nitrate  
602 amended agar plates and were incubated for 6 hours in light. Root samples were collected and homogenized  
603 in liquid N<sub>2</sub> and then extracted with extraction buffer – 50 mM Tris-HCl, pH 7.5, 150 mM NaCl, 0.5%  
604 Triton X-100, 10 μM MG-132 and 0.1 mM PMSF - supplemented with protease and phosphatase inhibitor  
605 cocktails (Roche). Buffer volumes were adjusted to fresh weight (100 μL/100 mg tissues). Homogenized  
606 samples were centrifuged (4°C, 15 min, 14000 rpm) and the supernatant was aliquoted (50μg protein/20-  
607 25 μL) and incubated at 45°C for 5 min in the presence of SDS loading buffer. Next, samples were loaded  
608 onto an acrylamide, Bis-Tris/HCl gel containing 50 μmol/L Phos-tag<sup>TM</sup> (AAL-107) pendant and Zn<sup>2+</sup> as  
609 cation. Electrophoresis were run at 15 mA/gel for 5~ 6 hours or until the proteins are nicely separated  
610 (usually until the 25 kDa prestained protein marker just exit the gel assembly). Next gels were incubated  
611 for 30 minutes in transfer buffer containing 10 mM EDTA and were blotted to PVDF membranes using  
612 Tris/Glycine transfer buffer (25 mM Tris, 192 mM Glycine, 5% methanol). After blocking with 5% milk  
613 in TBST, the membrane was probed with α-PIN2 antibody (1:1000) for 2 h (RT) followed by α-rabbit IgG-  
614 HRP (1:15000) (Amersham) for 1 h (RT). After treating the membrane with Supersignal West Femto  
615 western chemiluminescent HRP substrate (Thermo Fisher Scientific), luminescent signals were detected  
616 using a liquid nitrogen-cooled charge-coupled device camera (Biorad). Digital images were analyzed, and  
617 signals were quantified using the Fiji software.

## 619 **Confocal microscopy and image analysis**

620 *eir1-1* mutants complemented with *PIN2::PIN2<sup>wt</sup>-GFP*, *PIN2::PIN2<sup>S439A</sup>-GFP*, *PIN2::PIN2<sup>S439D</sup>-GFP* were  
621 grown in modified MS plates with 1 mM ammonium as the only N source. 2 week-old plants were treated  
622 with 5 mM nitrate or without treatment (control conditions) for 2 hours. Roots were stained with propidium  
623 iodide (PI) and mounted on a slide for microscopic analysis. Images were acquired with Zeiss LSM880  
624 confocal microscope with Airyscan equipped with a 40×Plan-Apochromat water immersion objective.  
625 Fluorescence signals for GFP (excitation 488 nm, emission 507 nm) and PI (excitation 536 nm, emission  
626 617 nm) were detected. Microscopy

628 For image quantification (PIN2-GFP fluorescence intensity measurements) maximum intensity projections  
629 of confocal pictures were used in epidermis and cortex cells. Images were handled and analyzed with Zeiss  
630 blue (v3.1) and Fiji (v1.52) software. The experiment was performed with 3 biological replicates and 3-4  
631 roots per experimental conditions were analyzed in each replicate.

632  
633  
634  
635  
636

637 **Figure Legends**

638

639 **Figure 1. Characterization of the phosphoproteome profile in *Arabidopsis* roots in response to nitrate.**

640 Venn diagrams show the overlap of transient (5 min) and more persistent (20 min) changes in  
641 phosphoprotein relative-abundance after 5 mM nitrate treatments compared with each control condition (5  
642 mM KCl) in *Arabidopsis* roots. (A) Overlap of phosphoproteins that were “up-regulated” by nitrate at 5  
643 min (dark yellow) and 20 min (light yellow) (B) Overlap of phosphoproteins that were “down-regulated”  
644 by nitrate at 5 min (blue) and 20 min (light blue). (C) Identification of common phosphoproteins with  
645 published phosphoproteome data-sets in response to nitrate-deprivation<sup>50</sup> or nitrate-resupply<sup>49</sup>.

646

647 **Figure 2. Functional analysis of the phosphoproteome profile reveals signaling and regulatory**  
648 **processes occurring in early and late response to nitrate.** The Figure showed a hierarchical clustering

649 of nitrate-phosphoproteins with differential abundance at 5- or 20-min in response to nitrate.  
650 Phosphoproteins were normalized by Z-score and clustered using the Euclidean distance method with  
651 average linkage. The resulting clusters are shown as a heat map, where vertical bars and numbers to the  
652 right of the map denote the group (composed of all terminal nodes in the hierarchical tree) of  
653 phosphoprotein (correlation > 0.9) with a selected profile in early (5-min) or late (20-min) nitrate-response.  
654 Functional Gene Ontology (GO) categories significantly enriched (hypergeometric test with FDR,  $p < 0.05$ )  
655 in each cluster are highlighted to the right of the group.

656

657

658 **Figure 3. Characterization of the phosphoproteome profile in response to nitrate in roots of**  
659 ***Arabidopsis* (Col-0) or *chl1-5* mutant plants.** Percentage of nitrate-phosphoproteome responses at 5 min  
660 in wild-type plants that were maintained in *chl1-5*-mutant plant roots.

661

662 **Figure 4. Gene network of nitrate-modulated phosphoproteins.** (A) A network for the phosphoproteins  
663 (encoded genes) and putative kinases family were represented as nodes with color and shapes assigned  
664 according to function (e.g., blue squares: metabolic encoded-genes, green triangle: transcription factors or  
665 grey hexagon: kinase families). Edges connecting nodes represent functional interactions: transcription  
666 factor/TARGET regulation or predicted kinase-substrate control. The size of the triangle or hexagon is  
667 proportional to the number of targets of the TF or putative kinase family, respectively. (B) Over-represented  
668 biological processes in the phosphoproteins gene-network in response to nitrate (hypergeometric test with  
669 FDR,  $p < 0.05$ ). The network was analyzed using BINGO and ClueGO tools in Cytoscape software. Over-  
670 represented gene ontology terms are shown as a node connected by edges based on semantic relationships  
671 as defined in the ontology.

672

673 **Figure 5. Nitrate regulates PIN2 phosphorylation levels.** (A) Schematic representation of the

674 phosphosite (Ser 439) identified in PIN2 in our study. PIN2 protein possesses three specific regions: a  
675 region with five transmembrane segments (residues 1–163), a central hydrophilic loop extending from  
676 residue 164 to 482 and a region with five additional transmembrane segments (residues 483–647). Protein  
677 alignment with PIN2 or PIN-like proteins from different species indicates conservation of the serine residue  
678 in eudicot, monocot, and gymnosperm species. The red arrow highlights the S439 in the central loop of  
679 PIN2 proteins in different plants. The size of each protein in amino acids and the percentage of identity  
680 against the *Arabidopsis* PIN2 are indicated. (B) Levels of PIN2 phosphopeptide in our experiments. Bars  
681 represent the mean plus standard error of replicates. The asterisk indicates statistically significant  
682 differences ( $p < 0.05$ ). (C) Detection of phosphorylation PIN2 by Phos-tag Western blotting. *Arabidopsis*  
683 plants (Col-0) were growth in ammonium as only nitrogen source, and treated with 5 mM KNO<sub>3</sub> or 5mM  
684 KCl as control. Total protein from roots were analyzed in SDS PAGE using Phos-tag to detect changes in  
685 phosphorylation status. Immunoblotting was performed with PIN2 antibody. Total proteins isolated from  
686 *eir1.1* roots were used as a negative control. (D) Western blot against PIN2 protein comparing nitrate treated  
687 (KNO<sub>3</sub>) and control (0) condition in *Arabidopsis* roots for all genotypes (*eir1-1* mutant background was

688 complemented with PIN2::PIN2<sup>wt</sup>-GFP (PIN2<sup>wt</sup>), PIN2::PIN2<sup>S439D</sup>-GFP (PIN2<sup>S439D</sup> phospho-mimic point  
689 mutation) or PIN2::PIN2<sup>S439A</sup>-GFP (PIN2<sup>S439A</sup>, phospho-null point mutation). (E) Time-course analysis of  
690 PIN2 mRNA levels in response to nitrate treatments in *Arabidopsis* roots.

691  
692

693 **Figure 6. PIN2 is essential for nitrate regulation of primary root growth and lateral root density.** (A)  
694 Primary root length of Col-0 wild type plants or *eir1-1* mutant plants was measured using the ImageJ  
695 program 3 days after 5 mM KNO<sub>3</sub> or KCl treatments. (B) Number of initiating and emerging lateral roots  
696 of Col-0 or *eir1-1* mutant plants were counted using light microscopy 3 days after 5 mM KNO<sub>3</sub> or KCl  
697 treatments. Bars represent mean plus standard error of replicate experiments. Asterisk indicates statistically  
698 significant difference between means (\*\*  $p < 0.01$ ).

699

700 **Figure 7. PIN2 dephosphorylation at S439 is important for modulation of primary root growth and**  
701 **lateral root density in response to nitrate treatments.** Four different genotypes were used in these  
702 experiments: *Arabidopsis* Col-0, *eir1-1* mutant background complemented with PIN2::PIN2<sup>wt</sup>-GFP  
703 (PIN2<sup>wt</sup>), PIN2::PIN2<sup>S439D</sup>-GFP (PIN2<sup>S439D</sup> phospho-mimic point mutation) or PIN2::PIN2<sup>S439A</sup>-GFP  
704 (PIN2<sup>S439A</sup>, phospho-null point mutation). All genotypes were grown hydroponically as described in  
705 Methods and treated with 5 mM nitrate or KCl (A) Primary root length of the different genotypes was  
706 measured using the ImageJ program 3 days after 5 mM KNO<sub>3</sub> or KCl treatments (B) Number of initiating  
707 and emerging lateral roots for all genotypes were counted using light microscopy 3 days after 5 mM KNO<sub>3</sub>  
708 or KCl treatments. Bars represent mean plus standard errors. Asterisk indicate statistically significant  
709 difference between means (\* $p < 0.05$ , \*\* $p < 0.01$ ).

710

711 **Figure 8. PIN2 phosphorylation at S439 is important for modulation of protein localization in**  
712 **response to nitrate treatments.** Three different genotypes were used in these experiments. *eir1-1* mutant  
713 background complemented with PIN2::PIN2<sup>wt</sup>-GFP (PIN2<sup>wt</sup>), PIN2::PIN2<sup>S439D</sup>-GFP (PIN2<sup>S439D</sup> phospho-  
714 mimic point mutation) or PIN2::PIN2<sup>S439A</sup>-GFP (PIN2<sup>S439A</sup>, phospho-null point mutation). All genotypes  
715 were grown hydroponically as described in Methods and treated with 5 mM nitrate for 2 hours. (A) Confocal  
716 microscopy using Zeiss Airyscan microscope and Zeiss-blue3.1 software was used to visualize PIN2 in  
717 *Arabidopsis* roots. “e” denotes epidermis and “c” cortex. Scale bar = 20  $\mu$ m. Tuckey box plots show PIN2-  
718 GFP fluorescence intensity quantification (number of roots analyzed per experimental conditions = 8-10;  
719 arbitrary units, a.u.) at the total cell membrane in roots (B), and from epidermal (C) and cortex (D) plasma  
720 membrane in the different genotypes. Letters denote statistically significant difference between means as  
721 determined by ANOVA analysis ( $p < 0.05$ ).

722

723 **Figure 9. Schematic model of the role of PIN2 and phosphorylation in root nitrate responses.** Nitrate  
724 treatments increase cytosolic calcium levels which interact with calcium binding proteins such as kinases  
725 in the nitrate signaling pathway. Kinases phosphorylate protein targets such as transcription factors that can  
726 mediate changes in gene expression in response to nitrate treatments. Nitrate can also cause  
727 dephosphorylation of specific proteins. We showed nitrate treatments promote PIN2 dephosphorylation at  
728 S439 which impact membrane localization and polarity of the PIN2 protein. This post-translational  
729 regulatory mechanism is important for modulation of primary root growth and lateral root density in  
730 response to nitrate treatments. Arrows and bar-headed solid lines represent activation or inhibition in  
731 response to nitrate, respectively. Dashed arrows indicate proposed connections.

732

733

734

735



736 **Figure S1. An overview of the root phosphoproteomic experiment.** (A) Experimental design to identify  
737 changes in phosphoproteins in response to nitrate treatments in *Arabidopsis thaliana* roots. (B)  
738 Phosphoproteomic strategy for the enrichment, quantification and analysis of phosphopeptides.

739  
740 **Figure S2. An overview of the root phosphoproteomic analysis.** (A) Distribution of the number of  
741 phosphosites per peptide for the indicated experimental data set (0, 5 or 20 minutes after nitrate treatment).  
742 (B) Relative distribution of phosphorylated residues in each peptide for indicated experimental data set. (C)  
743 Distribution of the number of phospho-peptides per protein for indicated experimental data set. (D)  
744 Percentage of phospho-proteins that present each phosphorylated residues for indicated data set.

745  
746 **Figure S3.** Distribution of phosphoproteins across GO categories: biological process (A), cellular functions  
747 (B) and sub cellular compartment (C) for each experimental data set.

748  
749 **Figure S4. Comparison between phosphoproteomics and transcriptomic dataset in response to**  
750 **nitrate.** The list of encoded genes in response to nitrate at transcriptomic (data-set 27 affymetrix experiment  
751 Canales et al., 2014) and phosphoproteomic (our work) levels were represented using the SUNGEAR tool  
752 (Poultney et al., 2007). The triangle shows each data set at the vertices: transcriptomic data-set,  
753 phosphoproteomic data (5 min), phosphoproteomic data (20 min). The size of the circles inside the figure  
754 are proportional with the number of genes in each data set, as indicated by the arrows around the circle.  
755 The number of genes is indicated in each circle.

756  
757 **Figure S5. Motif-X analysis of nitrate-responsive phosphopeptides.** Amino acid sequences from -5 to  
758 +5 residues (the phosphorylated residue was 0) were scanned with the Motif-X algorithm. Motif list of  
759 phosphopeptides that met the criteria for phosphoproteins up-regulated (A) and down-regulated (B) by  
760 nitrate at 5 min. Motif list of phosphopeptides that met the criteria for phosphoproteins up-regulated (C)  
761 and down-regulated (D) by nitrate at 20 min See table S1 for the complete set of nitrate-regulated  
762 phosphoproteins.

763  
764 **Figure S6. Phosphoprotein PIN2 (S439) in root gravitropic response.** *pin2* null mutant background  
765 (*eir1-1*) complemented with non-modified or wild type version of PIN2 (PIN2<sup>wt</sup>), phospho-null (S439A) or  
766 phospho-mimic (S439D) versions of PIN2 (PIN2<sup>S439A</sup> or PIN2<sup>S439D</sup>, respectively) were grown in MS agar  
767 plate supplemented with 0 mM (A) or 5 mM (B) nitrate. At day 7, plates were rotated 90° and root curvature  
768 was measured at 24 hours with imageJ software. The figure shown a histogram of root gravitropic response  
769 where the length of black bars indicates the relative frequency of plants with the corresponding classes of  
770 angle. The average ( $\mu$ ) plus standard deviation of seedlings scored per line is indicated below each circle.  
771 Asterisk indicate statistically significant difference between means (\*\* $p < 0.01$ ).

772  
773  
774

775 **References**  
776

- 777 1. Robertson, G. P. & Vitousek, P. M. Nitrogen in Agriculture: Balancing the Cost of an Essential Resource.  
778 *Environ Resour* **34**, 97–125 (2009).
- 779 2. Crutzen, P. J., Mosier, A. R., Smith, K. A. & Winiwarter, W. N<sub>2</sub>O release from agro-biofuel production negates  
780 global warming reduction by replacing fossil fuels. *Atmos Chem Phys* **8**, 389–395 (2008).
- 781 3. Davidson, E. A. The contribution of manure and fertilizer nitrogen to atmospheric nitrous oxide since 1860. *Nat*  
782 *Geosci* **2**, 659–662 (2009).
- 783 4. Wirén, N. von *et al.* Differential regulation of three functional ammonium transporter genes by nitrogen in root  
784 hairs and by light in leaves of tomato. *Plant J* **21**, 167–175 (2000).
- 785 5. Vanacker, H. *et al.* Roles for redox regulation in leaf senescence of pea plants grown on different sources of  
786 nitrogen nutrition. *J Exp Bot* **57**, 1735–1745 (2006).
- 787 6. Zhang, H. *et al.* Dual pathways for regulation of root branching by nitrate. *Proc National Acad Sci* **96**, 6529–34  
788 (1999).
- 789 7. Vidal, E. A. *et al.* Nitrate-responsive miR393/AFB3 regulatory module controls root system architecture in  
790 *Arabidopsis thaliana*. *Proc National Acad Sci* **107**, 4477–4482 (2010).
- 791 8. Marín, I. C. *et al.* Nitrate regulates floral induction in *Arabidopsis*, acting independently of light, gibberellin and  
792 autonomous pathways. *Planta* **233**, 539–552 (2010).
- 793 9. Gras, D. *et al.* SMZ/SNZ and gibberellin signaling are required for nitrate-elicited delay of flowering time in  
794 *Arabidopsis thaliana*. *J Exp Bot* **69**, 619–631 (2018).
- 795 10. Zhang, H. & Forde, B. G. An *Arabidopsis* MADS box gene that controls nutrient-induced changes in root  
796 architecture. *Science* **279**, 407–409 (1998).
- 797 11. Gojon, A., Nacry, P. & Davidian, J.-C. Root uptake regulation: a central process for NPS homeostasis in plants.  
798 *Curr Opin Plant Biol* **12**, 328–338 (2009).
- 799 12. Zhang, H., Rong, H. & Pilbeam, D. Signalling mechanisms underlying the morphological responses of the root  
800 system to nitrogen in *Arabidopsis thaliana*. *J Exp Bot* **58**, 2329–2338 (2007).
- 801 13. Crawford, N. M. & Forde, B. G. Molecular and developmental biology of inorganic nitrogen nutrition.  
802 *Arabidopsis Book* **1**, e0011 (2002).
- 803 14. Gutiérrez, R. A. Systems biology for enhanced plant nitrogen nutrition. *Science* **336**, 1673–1675 (2012).
- 804 15. Vidal, E. A. & Gutiérrez, R. A. A systems view of nitrogen nutrient and metabolite responses in *Arabidopsis*.  
805 *Curr Opin Plant Biol* **11**, 521–529 (2008).
- 806 16. Gutiérrez, R. A. *et al.* Qualitative network models and genome-wide expression data define carbon/nitrogen-  
807 responsive molecular machines in *Arabidopsis*. *Genome Biol* **8**, R7 (2006).

- 808 17. Wang, R., Okamoto, M. & Xing, X. Microarray Analysis of the Nitrate Response in Arabidopsis Roots and  
809 Shoots Reveals over 1 , 000 Rapidly Responding Genes and New Linkages to Glucose , Trehalose-6-Phosphate ,  
810 Iron , and Sulfate Metabolism. *Plant Physiology* **132**, 556–567 (2003).
- 811 18. Scheible, W.-R. *et al.* Genome-wide reprogramming of primary and secondary metabolism, protein synthesis,  
812 cellular growth processes, and the regulatory infrastructure of Arabidopsis in response to nitrogen. *Plant Physiol*  
813 **136**, 2483–2499 (2004).
- 814 19. Wang, R. *et al.* Genomic analysis of the nitrate response using a nitrate reductase-null mutant of Arabidopsis.  
815 *Plant Physiol* **136**, 2512–2522 (2004).
- 816 20. Gutiérrez, R. A. *et al.* Insights into the genomic nitrate response using genetics and the SunGear Software  
817 System. *J Exp Bot* **58**, 2359–2367 (2007).
- 818 21. Gaudinier, A. *et al.* Transcriptional regulation of nitrogen-associated metabolism and growth. *Nature* **563**, 259–  
819 264 (2018).
- 820 22. Varala, K. *et al.* Temporal transcriptional logic of dynamic regulatory networks underlying nitrogen signaling  
821 and use in plants. *Proc National Acad Sci* **115**, 6494–6499 (2018).
- 822 23. Brooks, M. D. *et al.* Network Walking charts transcriptional dynamics of nitrogen signaling by integrating  
823 validated and predicted genome-wide interactions. *Nat Commun* **10**, 1569 (2019).
- 824 24. Gutiérrez, R. A. *et al.* Systems approach identifies an organic nitrogen-responsive gene network that is regulated  
825 by the master clock control gene CCA1. *Proc National Acad Sci* **105**, 4939–4944 (2008).
- 826 25. Ruffel, S., Poitout, A., Krouk, G., Coruzzi, G. M. & Lacombe, B. Long-distance nitrate signaling displays  
827 cytokinin dependent and independent branches. *J Integr Plant Biol* **58**, 226–229 (2016).
- 828 26. Ruffel, S. *et al.* Nitrogen economics of root foraging: transitive closure of the nitrate-cytokinin relay and distinct  
829 systemic signaling for N supply vs. demand. *Proc National Acad Sci* **108**, 18524–18529 (2011).
- 830 27. Poitout, A. *et al.* Responses to Systemic Nitrogen Signaling in Arabidopsis Roots Involve trans-Zeatin in  
831 Shoots. *Plant Cell* **30**, 1243–1257 (2018).
- 832 28. Chen, X. *et al.* Shoot-to-Root Mobile Transcription Factor HY5 Coordinates Plant Carbon and Nitrogen  
833 Acquisition. *Curr Biol* **26**, 640–646 (2016).
- 834 29. Ohkubo, Y., Tanaka, M., Tabata, R., Ogawa-Ohnishi, M. & Matsubayashi, Y. Shoot-to-root mobile polypeptides  
835 involved in systemic regulation of nitrogen acquisition. *Nat Plants* **3**, 1–6 (2017).
- 836 30. Liu, K. *et al.* Discovery of nitrate–CPK–NLP signalling in central nutrient–growth networks. *Nature* **545**, 311  
837 316 (2017).
- 838 31. Liu, K. & Tsay, Y.-F. Switching between the two action modes of the dual-affinity nitrate transporter CHL1 by  
839 phosphorylation. *Embo J* **22**, 1005–1013 (2003).
- 840 32. Bachmann, M., Huber, J. L., Liao, P.-C., Gage, D. A. & Huber, S. C. The inhibitor protein of phosphorylated  
841 nitrate reductase from spinach (*Spinacia oleracea*) leaves is a 14-3-3 protein. *FEBS Lett* **387**, 127–131 (1996).
- 842 33. Kaiser, W. M. *et al.* Modulation of nitrate reductase: some new insights, an unusual case and a potentially  
843 important side reaction. *J Exp Bot* **53**, 875–882 (2002).

- 844 34. Huber, J. L., Huber, S. C., Campbell, W. H. & Redinbaugh, M. G. Reversible light/dark modulation of spinach  
845 leaf nitrate reductase activity involves protein phosphorylation. *Arch Biochem Biophys* **296**, 58–65 (1992).
- 846 35. MacKintosh, C. Regulation of spinach-leaf nitrate reductase by reversible phosphorylation. *Biochimica Et*  
847 *Biophysica Acta Bba - Mol Cell Res* **1137**, 121–126 (1992).
- 848 36. Athwal, G. S. & Huber, S. C. Divalent cations and polyamines bind to loop 8 of 14-3-3 proteins, modulating  
849 their interaction with phosphorylated nitrate reductase. *Plant J* **29**, 119–129 (2002).
- 850 37. Sakakibara, H., Kobayashi, K. & Deji, A. Partial characterization of the signaling pathway for the nitrate-  
851 dependent expression of genes for nitrogen-assimilatory enzymes using detached maize leaves. *Plant and Cell ...*  
852 (1997).
- 853 38. Sueyoshi, K. *et al.* Effects of inhibitors for signaling components on the expression of the genes for nitrate  
854 reductase and nitrite reductase in excised barley leaves. *Soil Sci Plant Nutr* **45**, 1015–1019 (1999).
- 855 39. Ho, C.-H., Lin, S.-H., Hu, H.-C. & Tsay, Y.-F. CHL1 functions as a nitrate sensor in plants. *Cell* **138**, 1184–1194  
856 (2009).
- 857 40. Bouguyon, E. *et al.* Multiple mechanisms of nitrate sensing by Arabidopsis nitrate transceptor NRT1.1. *Nat*  
858 *Plants* **1**, 15015 (2015).
- 859 41. Bouguyon, E. *et al.* Nitrate Controls Root Development through Post-Transcriptional Regulation of the  
860 NRT1.1/NPF6.3 transporter/sensor. *Plant Physiol* **172**, pp.01047.2016–12 (2016).
- 861 42. Hu, H.-C., Wang, Y.-Y. & Tsay, Y.-F. AtCIPK8, a CBL-interacting protein kinase, regulates the low-affinity  
862 phase of the primary nitrate response. *Plant J* **57**, 264–278 (2009).
- 863 43. L eran, S. *et al.* Nitrate sensing and uptake in Arabidopsis are enhanced by ABI2, a phosphatase inactivated by  
864 the stress hormone abscisic acid. *Sci Signal* **8**, ra43–ra43 (2015).
- 865 44. Kudla, J., Batistic, O. & Hashimoto, K. Calcium signals: the lead currency of plant information processing.  
866 *Plant Cell Online* **22**, 541–63 (2010).
- 867 45. Riveras, E. *et al.* The Calcium Ion Is a Second Messenger in the Nitrate Signaling Pathway of Arabidopsis. *Plant*  
868 *Physiol* **169**, 1397–1404 (2015).
- 869 46. Dodds, P. N. & Rathjen, J. P. Plant immunity: towards an integrated view of plant-pathogen interactions. *Nat*  
870 *Rev Genet* **11**, 539–548 (2010).
- 871 47. Hashimoto, K. & Kudla, J. Calcium decoding mechanisms in plants. *Biochimie* **93**, 2054–2059 (2011).
- 872 48. Liu, K.-H., Diener, A., Lin, Z., Liu, C. & Sheen, J. Primary nitrate responses mediated by calcium signalling and  
873 diverse protein phosphorylation. *J Exp Bot* (2020) doi:10.1093/jxb/eraa047.
- 874 49. Engelsberger, W. R. & Schulze, W. X. Nitrate and ammonium lead to distinct global dynamic phosphorylation  
875 patterns when resupplied to nitrogen-starved Arabidopsis seedlings. *Plant J* **69**, 978–995 (2012).
- 876 50. Menz, J., Li, Z., Schulze, W. X. & Ludewig, U. Early nitrogen-deprivation responses in Arabidopsis roots reveal  
877 distinct differences on transcriptome and (phospho-) proteome levels between nitrate and ammonium nutrition.  
878 *Plant J* **88**, 717–734 (2016).

- 879 51. Huttlin, E. L. *et al.* A tissue-specific atlas of mouse protein phosphorylation and expression. *Cell* **143**, 1174–1189  
880 (2010).
- 881 52. Walley, J. W. *et al.* Integration of omic networks in a developmental atlas of maize. *Science* **353**, 814–818  
882 (2016).
- 883 53. Walley, J. W. *et al.* Reconstruction of protein networks from an atlas of maize seed proteotypes. *Proc National  
884 Acad Sci* **110**, E4808–E4817 (2013).
- 885 54. Umezawa, T. *et al.* Genetics and phosphoproteomics reveal a protein phosphorylation network in the abscisic  
886 acid signaling pathway in *Arabidopsis thaliana*. *Sci Signal* **6**, rs8–rs8 (2013).
- 887 55. Lin, L.-L. *et al.* Integrating Phosphoproteomics and Bioinformatics to Study Brassinosteroid-Regulated  
888 Phosphorylation Dynamics in *Arabidopsis*. *Bmc Genomics* **16**, 1–17 (2015).
- 889 56. Zhang, M. *et al.* Phosphoproteome analysis reveals new drought response and defense mechanisms of seedling  
890 leaves in bread wheat (*Triticum aestivum* L.). *J Proteomics* **109**, 290–308 (2014).
- 891 57. Zhang, H. *et al.* Quantitative phosphoproteomics after auxin-stimulated lateral root induction identifies an SNX1  
892 protein phosphorylation site required for growth. *Mol Cell Proteomics* **12**, 1158–1169 (2013).
- 893 58. Alvarez, J. M. *et al.* Systems approach identifies TGA1 and TGA4 transcription factors as important regulatory  
894 components of the nitrate response of *Arabidopsis thaliana* roots. *Plant J* **80**, 1–13 (2014).
- 895 59. Gifford, M. L., Dean, A., Gutiérrez, R. A., Coruzzi, G. M. & Birnbaum, K. D. Cell-specific nitrogen responses  
896 mediate developmental plasticity. *Proc National Acad Sci* **105**, 803–808 (2008).
- 897 60. Facette, M. R., Shen, Z., Bjornsdottir, F. R., Briggs, S. P. & Smith, L. G. Parallel Proteomic and  
898 Phosphoproteomic Analyses of Successive Stages of Maize Leaf Development. *Plant Cell* **25**, 2798–2812 (2013).
- 899 61. Lan, P., Li, W., Wen, T. N. & Schmidt, W. Quantitative Phosphoproteome Profiling of Iron-Deficient  
900 *Arabidopsis* Roots. *Plant Physiol* **159**, 403–417 (2012).
- 901 62. Canales, J., Moyano, T. C., Villarroel, E. & Gutiérrez, R. A. Systems analysis of transcriptome data provides  
902 new hypotheses about *Arabidopsis* root response to nitrate treatments. *Front Plant Sci* **5**, 22 (2014).
- 903 63. Katari, M. S. *et al.* VirtualPlant: a software platform to support systems biology research. *Plant Physiol* **152**, 500  
904 515 (2010).
- 905 64. Mi, H., Muruganujan, A., Ebert, D., Huang, X. & Thomas, P. D. PANTHER version 14: more genomes, a new  
906 PANTHER GO-slim and improvements in enrichment analysis tools. *Nucleic Acids Res* **47**, D419–D426 (2018).
- 907 65. Mi, H. *et al.* Protocol Update for large-scale genome and gene function analysis with the PANTHER  
908 classification system (v.14.0). *Nat Protoc* **14**, 703–721 (2019).
- 909 66. Alvarez, J. M. *et al.* Transient genome-wide interactions of the master transcription factor NLP7 initiate a rapid  
910 nitrogen-response cascade. *Nat Commun* **11**, 1157 (2020).
- 911 67. Heazlewood, J. L. *et al.* PhosPhAt: a database of phosphorylation sites in *Arabidopsis thaliana* and a plant-  
912 specific phosphorylation site predictor. *Nucleic Acids Res* **36**, D1015–D1021 (2007).

- 913 68. Durek, P. *et al.* PhosPhAt: the Arabidopsis thaliana phosphorylation site database. An update. *Nucleic Acids Res*  
914 **38**, D828–D834 (2010).
- 915 69. Lanquar, V. *et al.* Feedback inhibition of ammonium uptake by a phospho-dependent allosteric mechanism in  
916 Arabidopsis. *Plant Cell Online* **21**, 3610–3622 (2009).
- 917 70. Su, W., Huber, S. C. & Crawford, N. M. Identification in vitro of a post-translational regulatory site in the hinge  
918 1 region of Arabidopsis nitrate reductase. *Plant Cell* **8**, 519–527 (1996).
- 919 71. Vidal, E. A., Moyano, T. C., Riveras, E., Contreras-Lopez, O. & Gutierrez, R. A. Systems approaches map  
920 regulatory networks downstream of the auxin receptor AFB3 in the nitrate response of Arabidopsis thaliana roots.  
921 *Proc National Acad Sci* **110**, 12840–12845 (2013).
- 922 72. Ma, W. *et al.* Auxin biosynthetic gene TAR2 is involved in low nitrogen-mediated reprogramming of root  
923 architecture in Arabidopsis. *Plant J* **78**, 70–79 (2014).
- 924 73. Wang, R., Xing, X., Wang, Y., Tran, A. & Crawford, N. M. A genetic screen for nitrate regulatory mutants  
925 captures the nitrate transporter gene NRT1.1. *Plant Physiol* **151**, 472–478 (2009).
- 926 74. Oughtred, R. *et al.* The BioGRID interaction database: 2019 update. *Nucleic Acids Res* **47**, D529–D541 (2018).
- 927 75. Bartlett, A. *et al.* Mapping genome-wide transcription-factor binding sites using DAP-seq. *Nat Protoc* **12**, 1659–  
928 1672 (2017).
- 929 76. Weirauch, M. T. *et al.* Determination and Inference of Eukaryotic Transcription Factor Sequence Specificity.  
930 *Cell* **158**, 1431–1443 (2014).
- 931 77. Schwartz, D. & Gygi, S. P. An iterative statistical approach to the identification of protein phosphorylation  
932 motifs from large-scale data sets. *Nat Biotechnol* **23**, 1391–1398 (2005).
- 933 78. Zulawski, M., Braginets, R. & Schulze, W. X. PhosPhAt goes kinases--searchable protein kinase target  
934 information in the plant phosphorylation site database PhosPhAt. *Nucleic Acids Res* **41**, D1176–84 (2012).
- 935 79. Shannon, P. *et al.* Cytoscape: a software environment for integrated models of biomolecular interaction  
936 networks. *Genome Research* **13**, 2498–2504 (2003).
- 937 80. Shibata, M. *et al.* GTL1 and DF1 regulate root hair growth through transcriptional repression of ROOT HAIR  
938 DEFECTIVE 6-LIKE 4 in Arabidopsis. *Development* **145**, dev159707 (2018).
- 939 81. Canales, J., Contreras-López, O., Álvarez, J. M. & Gutiérrez, R. A. Nitrate induction of root hair density is  
940 mediated by TGA1/TGA4 and CPC transcription factors in Arabidopsis thaliana. *Plant J* **92**, 305–316 (2017).
- 941 82. Popescu, S. C. *et al.* MAPK target networks in Arabidopsis thaliana revealed using functional protein  
942 microarrays. *Gene Dev* **23**, 80–92 (2008).
- 943 83. Feng, Z., Zhu, J., Du, X. & Cui, X. Effects of three auxin-inducible LBD members on lateral root formation in  
944 Arabidopsis thaliana. *Planta* **236**, 1227–1237 (2012).
- 945 84. Krouk, G. *et al.* Nitrate-Regulated Auxin Transport by NRT1.1 Defines a Mechanism for Nutrient Sensing in  
946 Plants. *Dev Cell* **18**, 927–937 (2010).

- 947 85. Walch-Liu, P., Liu, L.-H., Remans, T., Tester, M. & Forde, B. G. Evidence that I-Glutamate Can Act as an  
948 Exogenous Signal to Modulate Root Growth and Branching in *Arabidopsis thaliana*. *Plant Cell Physiol* **47**, 1045–  
949 1057 (2006).
- 950 86. Mounier, E., PERVENT, M., Ljung, K., Gojon, A. & Nacry, P. Auxin-mediated nitrate signalling by NRT1.1  
951 participates in the adaptive response of *Arabidopsis* root architecture to the spatial heterogeneity of nitrate  
952 availability. *Plant Cell Environ* **37**, 162–174 (2013).
- 953 87. Barbosa, I. C. R., Hammes, U. Z. & Schwechheimer, C. Activation and Polarity Control of PIN-FORMED  
954 Auxin Transporters by Phosphorylation. *Trends Plant Sci* **23**, 523–538 (2018).
- 955 88. Huang, F. *et al.* Phosphorylation of conserved PIN motifs directs *Arabidopsis* PIN1 polarity and auxin transport.  
956 *Plant Cell Online* **22**, 1129–1142 (2010).
- 957 89. Zhang, J., Nodzynski, T., Pencík, A., Rolcík, J. & Friml, J. PIN phosphorylation is sufficient to mediate PIN  
958 polarity and direct auxin transport. *Proc National Acad Sci* **107**, 918–922 (2010).
- 959 90. Friml, J. *et al.* A PINOID-Dependent Binary Switch in Apical-Basal PIN Polar Targeting Directs Auxin Efflux.  
960 *Science* **306**, 862–865 (2004).
- 961 91. Weller, B. *et al.* Dynamic PIN-FORMED auxin efflux carrier phosphorylation at the plasma membrane controls  
962 auxin efflux-dependent growth. *Proc National Acad Sci* **114**, 201614380–201614380 (2017).
- 963 92. Michniewicz, M. *et al.* Antagonistic Regulation of PIN Phosphorylation by PP2A and PINOID Directs Auxin  
964 Flux. *Cell* **130**, 1044–1056 (2007).
- 965 93. Benková, E. *et al.* Local, Efflux-Dependent Auxin Gradients as a Common Module for Plant Organ Formation.  
966 *Cell* **115**, 591–602 (2003).
- 967 94. Luschnig, C., Gaxiola, R. A., Grisafi, P. & Fink, G. R. EIR1, a root-specific protein involved in auxin transport,  
968 is required for gravitropism in *Arabidopsis thaliana*. *Gene Dev* **12**, 2175–2187 (1998).
- 969 95. Müller, A. *et al.* AtPIN2 defines a locus of *Arabidopsis* for root gravitropism control. *Embo J* **17**, 6903–6911  
970 (1998).
- 971 96. Laskowski, M. *et al.* Root system architecture from coupling cell shape to auxin transport. *Plos Biol* **6**, e307  
972 (2008).
- 973 97. Roman, G., Lubarsky, B., Kieber, J. J., Rothenberg, M. & Ecker, J. R. Genetic analysis of ethylene signal  
974 transduction in *Arabidopsis thaliana*: five novel mutant loci integrated into a stress response pathway. *Genetics* **139**,  
975 1393–1409 (1995).
- 976 98. Vu, L. D. *et al.* Up-to-Date Workflow for Plant (Phospho)proteomics Identifies Differential Drought-Responsive  
977 Phosphorylation Events in Maize Leaves. *J Proteome Res* **15**, 4304–4317 (2016).
- 978 99. Wang, P. *et al.* Quantitative phosphoproteomics identifies SnRK2 protein kinase substrates and reveals the  
979 effectors of abscisic acid action. *Proc National Acad Sci* **110**, 11205–11210 (2013).
- 980 100. Kline, K. G., Barrett-Wilt, G. A. & Sussman, M. R. In planta changes in protein phosphorylation induced by  
981 the plant hormone abscisic acid. *Proc National Acad Sci* **107**, 15986–15991 (2010).

- 982 101. Ondzighi-Assoume, C. A., Chakraborty, S. & Harris, J. M. Environmental Nitrate Stimulates Abscisic Acid  
983 Accumulation in Arabidopsis Root Tips by Releasing It from Inactive Stores. *Plant Cell* **28**, 729–745 (2016).
- 984 102. Signora, L., Smet, I. D., Foyer, C. H. & Zhang, H. ABA plays a central role in mediating the regulatory effects  
985 of nitrate on root branching in Arabidopsis. *Plant J* **28**, 655–662 (2001).
- 986 103. Vogel, C. & Marcotte, E. M. Insights into the regulation of protein abundance from proteomic and  
987 transcriptomic analyses. *Nat Rev Genet* **13**, 227 (2012).
- 988 104. Obayashi, T. *et al.* ATTED-II in 2014: evaluation of gene coexpression in agriculturally important plants. *Plant*  
989 *Cell Physiol* **55**, e6(1 7) (2014).
- 990 105. Maghiaoui, A. *et al.* The Arabidopsis NRT1.1 transceptor coordinately controls auxin biosynthesis and  
991 transport to regulate root branching in response to nitrate. *J Exp Bot* (2020) doi:10.1093/jxb/eraa242.
- 992 106. Krouk, G. Hormones and nitrate: a two-way connection. *Plant Mol Biol* **91**, 599–606 (2016).
- 993 107. Krouk, G. *et al.* A framework integrating plant growth with hormones and nutrients. *Trends Plant Sci* **16**, 178  
994 182 (2011).
- 995 108. Vega, A., O'Brien, J. A. & Gutiérrez, R. A. Nitrate and hormonal signaling crosstalk for plant growth and  
996 development. *Curr Opin Plant Biol* **52**, 155–163 (2019).
- 997 109. Dhonukshe, P. *et al.* Plasma membrane-bound AGC3 kinases phosphorylate PIN auxin carriers at TPRXS(N/S)  
998 motifs to direct apical PIN recycling. *Development* **137**, 3245–3255 (2010).
- 999 110. Ganguly, A., Park, M., Kesawat, M. S. & Cho, H.-T. Functional Analysis of the Hydrophilic Loop in  
1000 Intracellular Trafficking of Arabidopsis PIN-FORMED Proteins. *Plant Cell* **26**, 1570–1585 (2014).
- 1001 111. Xu, W. *et al.* PIN2 is required for the adaptation of Arabidopsis roots to alkaline stress by modulating proton  
1002 secretion. *J Exp Bot* **63**, 6105–6114 (2012).
- 1003 112. Kumar, M. *et al.* Arabidopsis response to low-phosphate conditions includes active changes in actin filaments  
1004 and PIN2 polarization and is dependent on strigolactone signalling. *J Exp Bot* **66**, 1499–1510 (2015).
- 1005 113. Tan, S. *et al.* The lipid code-dependent phosphoswitch PDK1–D6PK activates PIN-mediated auxin efflux in  
1006 Arabidopsis. *Nat Plants* 1–14 (2020) doi:10.1038/s41477-020-0648-9.
- 1007 114. Xiao, Y. & Offringa, R. PDK1 regulates auxin transport and Arabidopsis vascular development through AGC1  
1008 kinase PAX. *Nat Plants* 1–12 (2020) doi:10.1038/s41477-020-0650-2.
- 1009 115. Gibson, D. G. *et al.* Enzymatic assembly of DNA molecules up to several hundred kilobases. *Nat Methods* **6**,  
1010 343–345 (2009).
- 1011 116. Hellens, R. P., Edwards, E. A., Leyland, N. R., Bean, S. & Mullineaux, P. M. pGreen: a versatile and flexible  
1012 binary Ti vector for Agrobacterium-mediated plant transformation. *Plant Mol Biol* **42**, 819–832 (2000).
- 1013 117. Xu, J. & Scheres, B. Dissection of Arabidopsis ADP-RIBOSYLATION FACTOR 1 Function in Epidermal  
1014 Cell Polarity. *Plant Cell* **17**, 525–536 (2005).
- 1015 118. Chalkley, R. J. & Clauser, K. R. Modification site localization scoring: strategies and performance. *Mol Cell*  
1016 *Proteom Mcp* **11**, 3–14 (2012).



- 1017 119. Eisen, M. B., Spellman, P. T., Brown, P. O. & Botstein, D. Cluster analysis and display of genome-wide  
1018 expression patterns. *Proceedings of the National Academy of Sciences of the United States of America* **95**, 14863  
1019 14868 (1998).
- 1020 120. Zulawski, M., Schulze, G., Braginets, R., Hartmann, S. & Schulze, W. X. The Arabidopsis Kinome: phylogeny  
1021 and evolutionary insights into functional diversification. *Bmc Genomics* **15**, 548 (2014).
- 1022 121. Maere, S., Heymans, K. & Kuiper, M. BiNGO: a Cytoscape plugin to assess overrepresentation of Gene  
1023 Ontology categories in Biological Networks. *Bioinformatics* **21**, 3448–3449 (2005).
- 1024 122. Komis, G., Takáč, T., Bekešová, S., Vadovič, P. & Samaj, J. Affinity-based SDS PAGE identification of  
1025 phosphorylated Arabidopsis MAPKs and substrates by acrylamide pendant Phos-Tag<sup>TM</sup>. *Methods Mol Biology*  
1026 *Clifton NJ* **1171**, 47–63 (2014).
- 1027

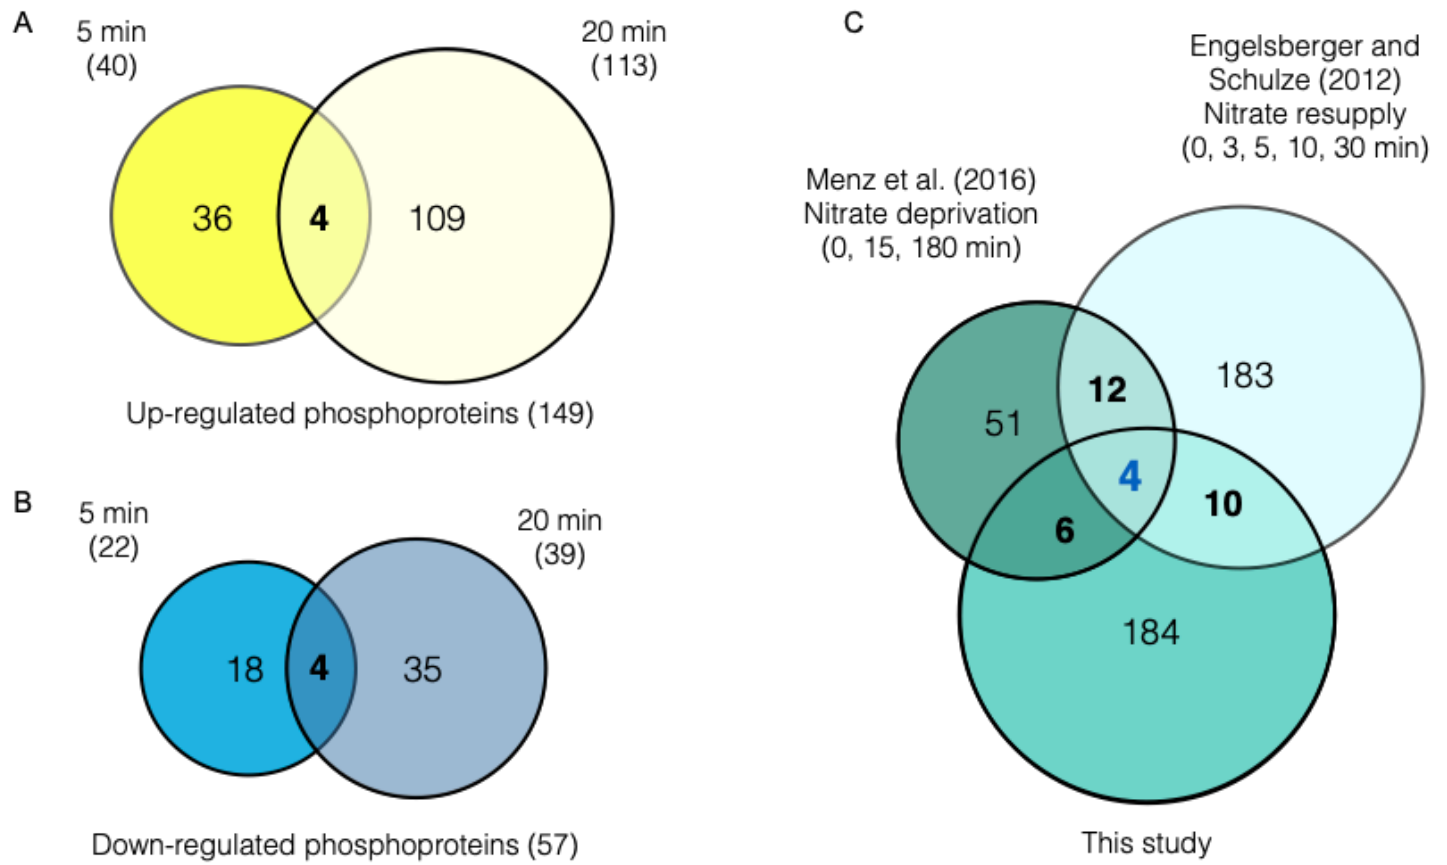

Figure 1

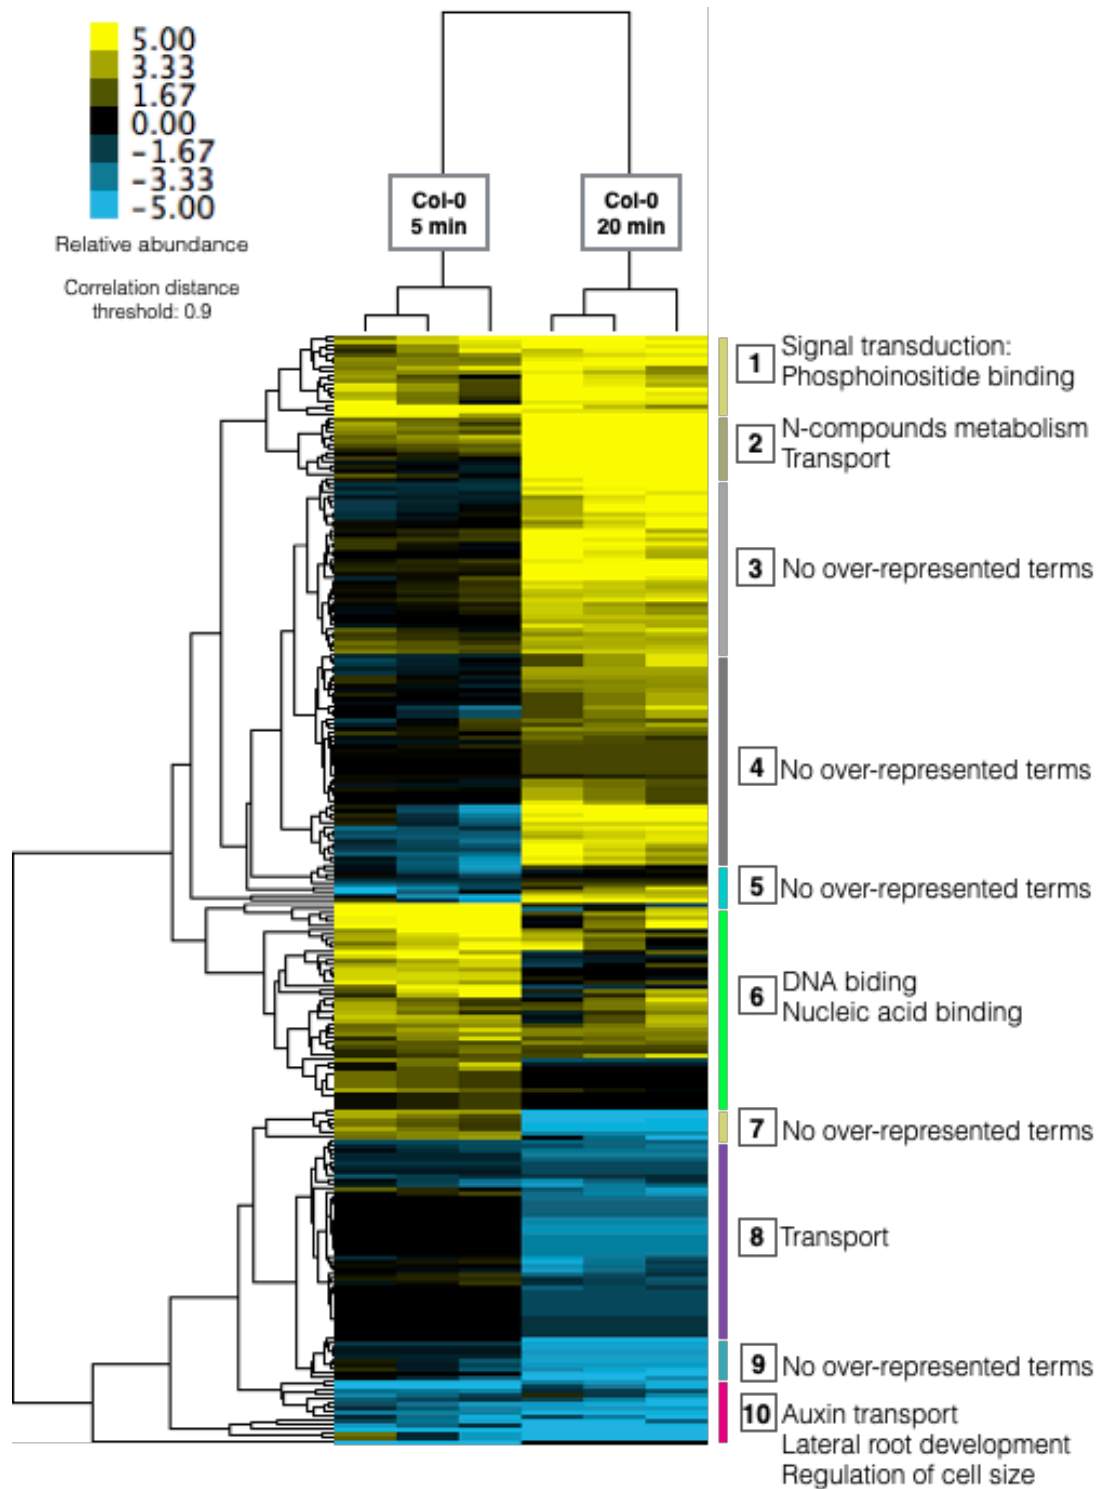

Figure 2

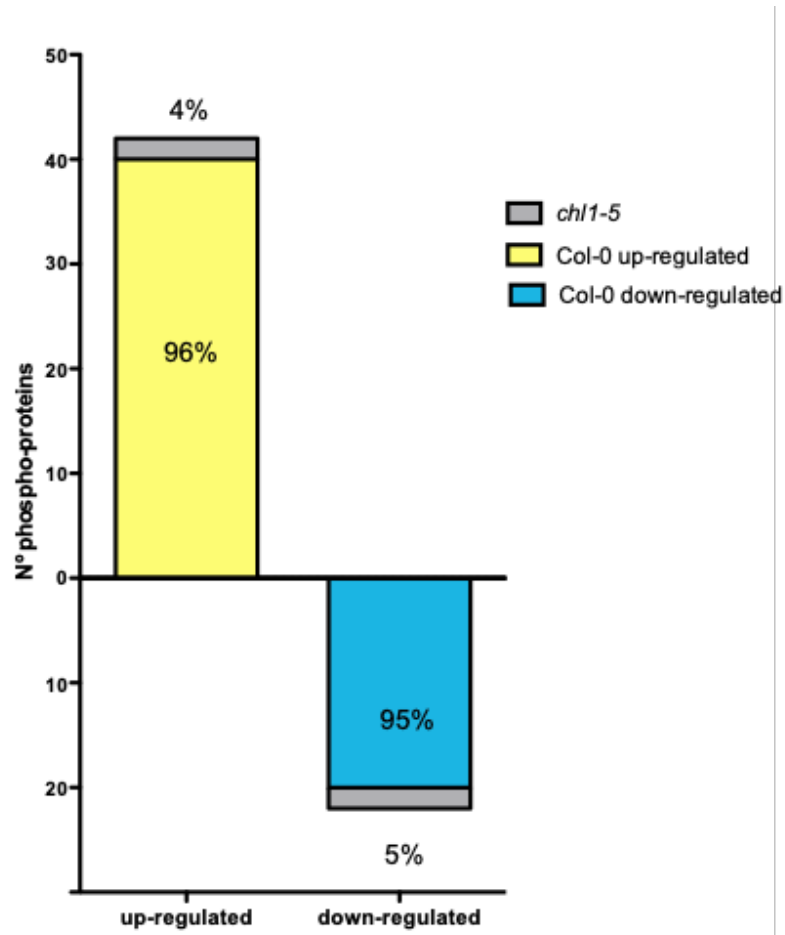

Figure 3

A

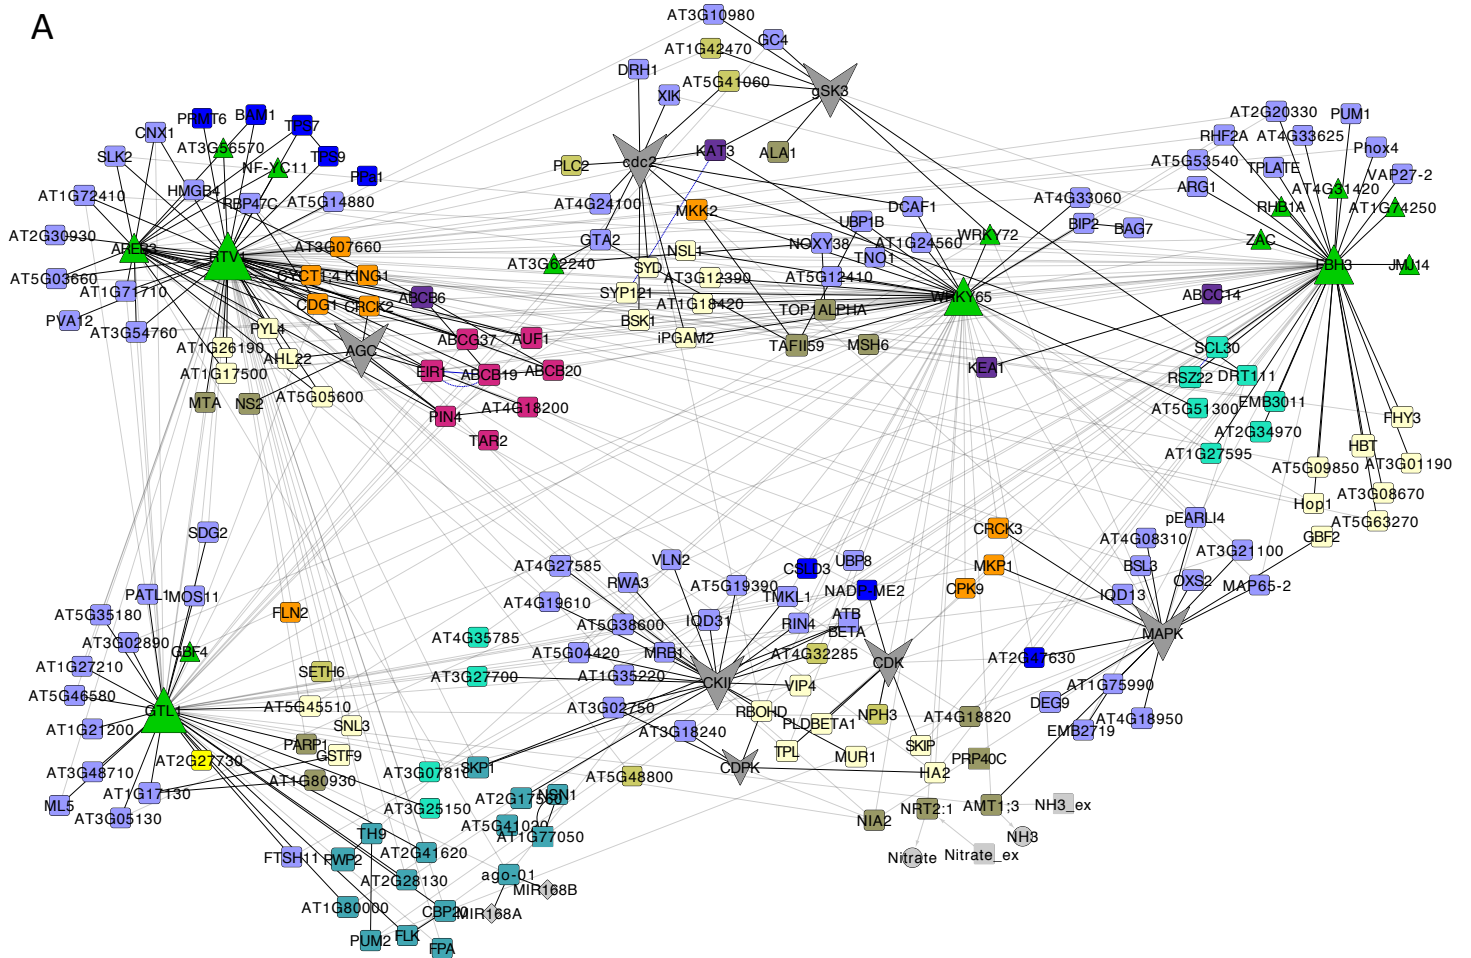

B

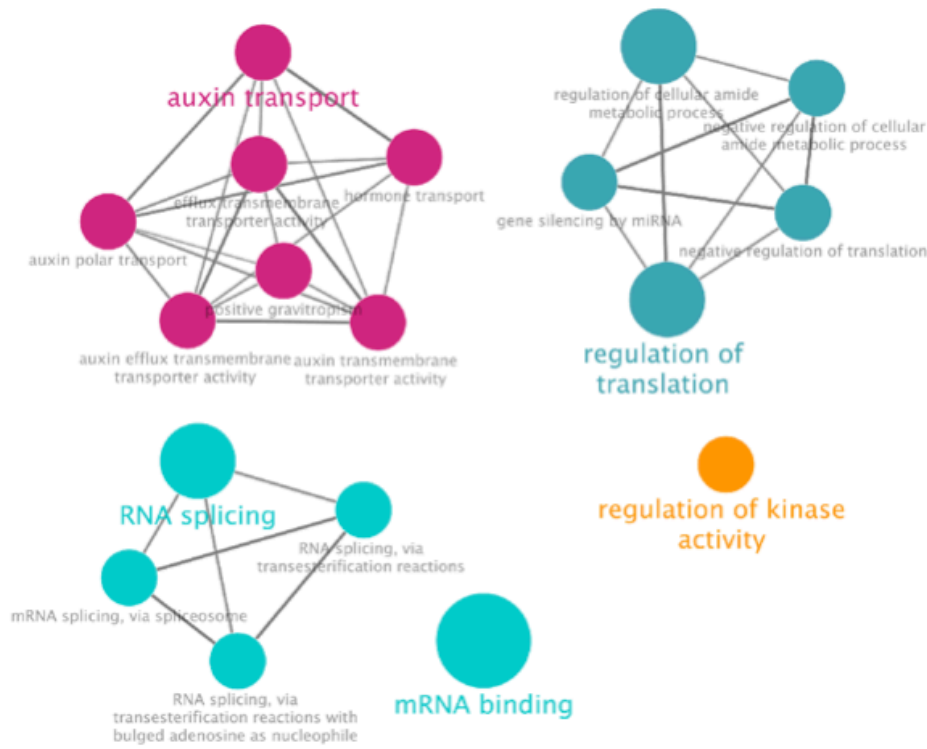

Figure 4

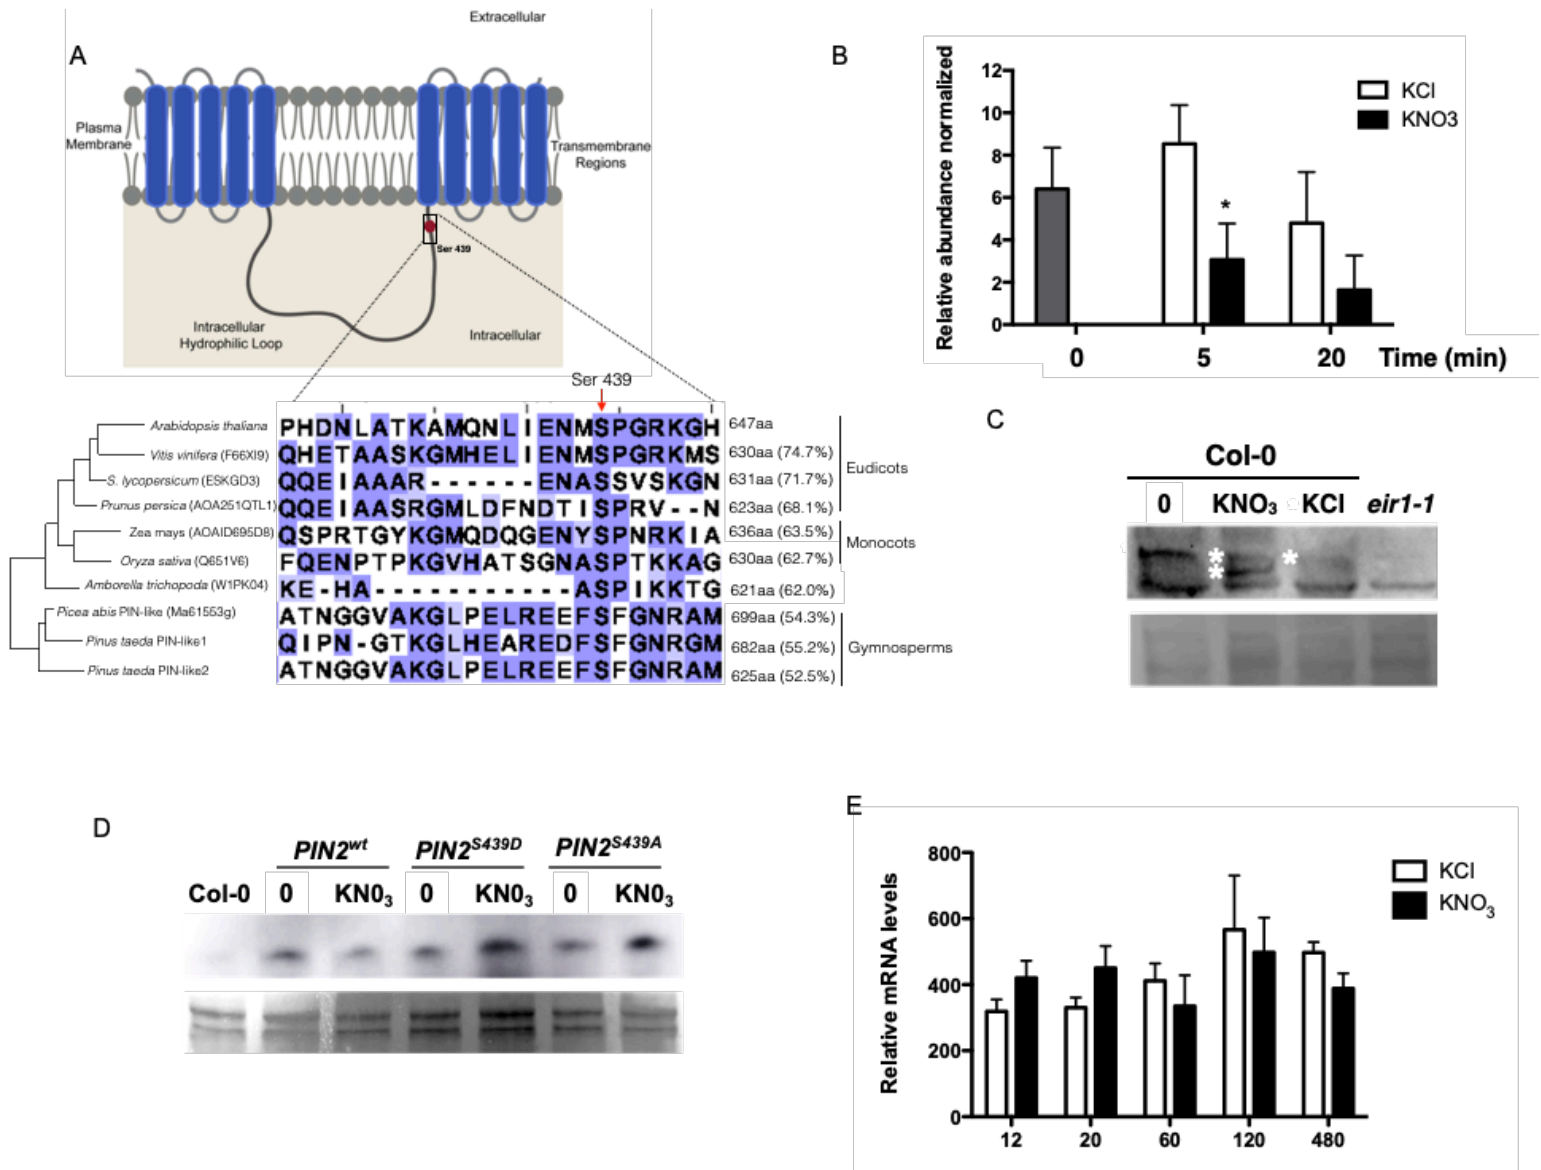

Figure 5

A

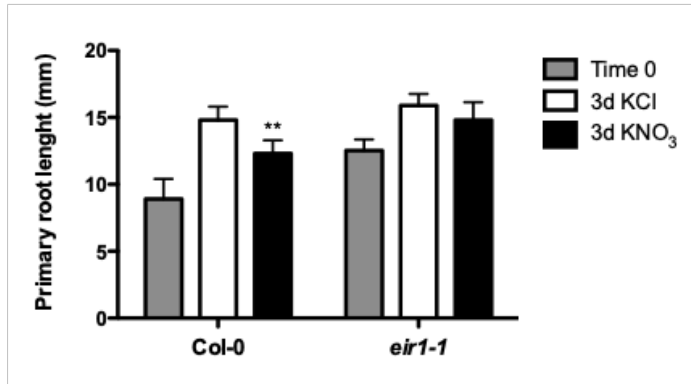

B

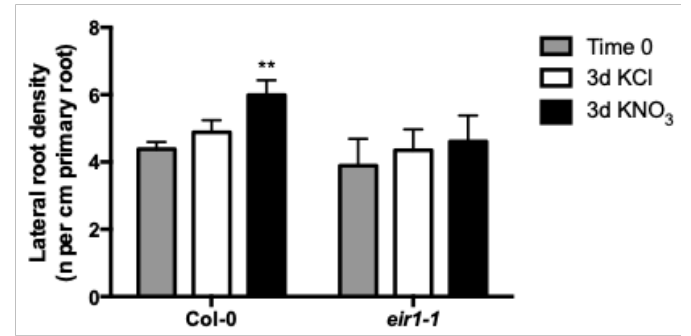

Figure 6

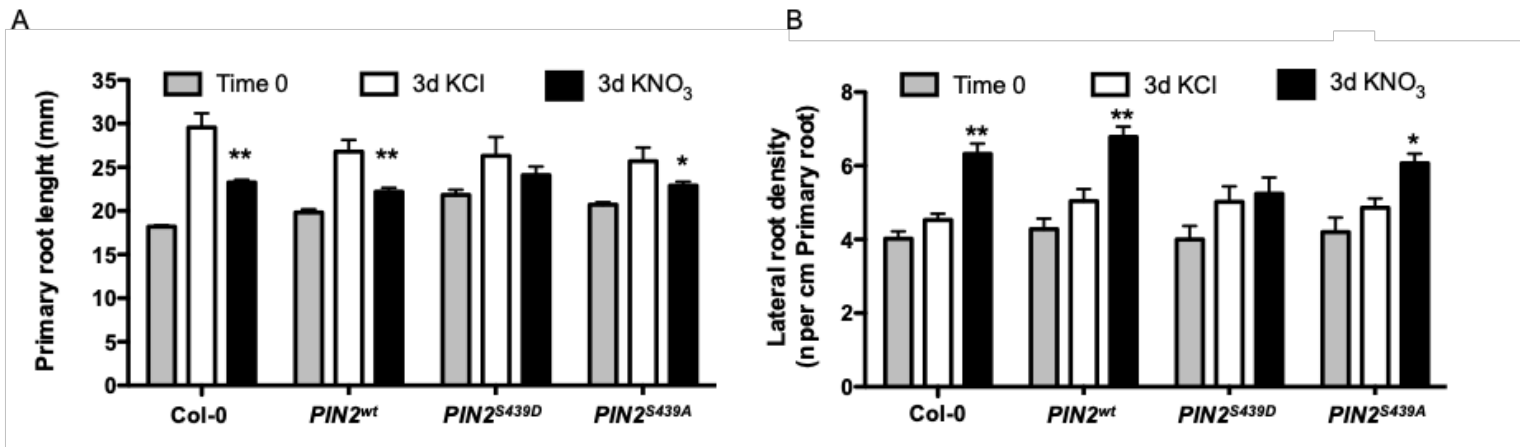

Figure 7



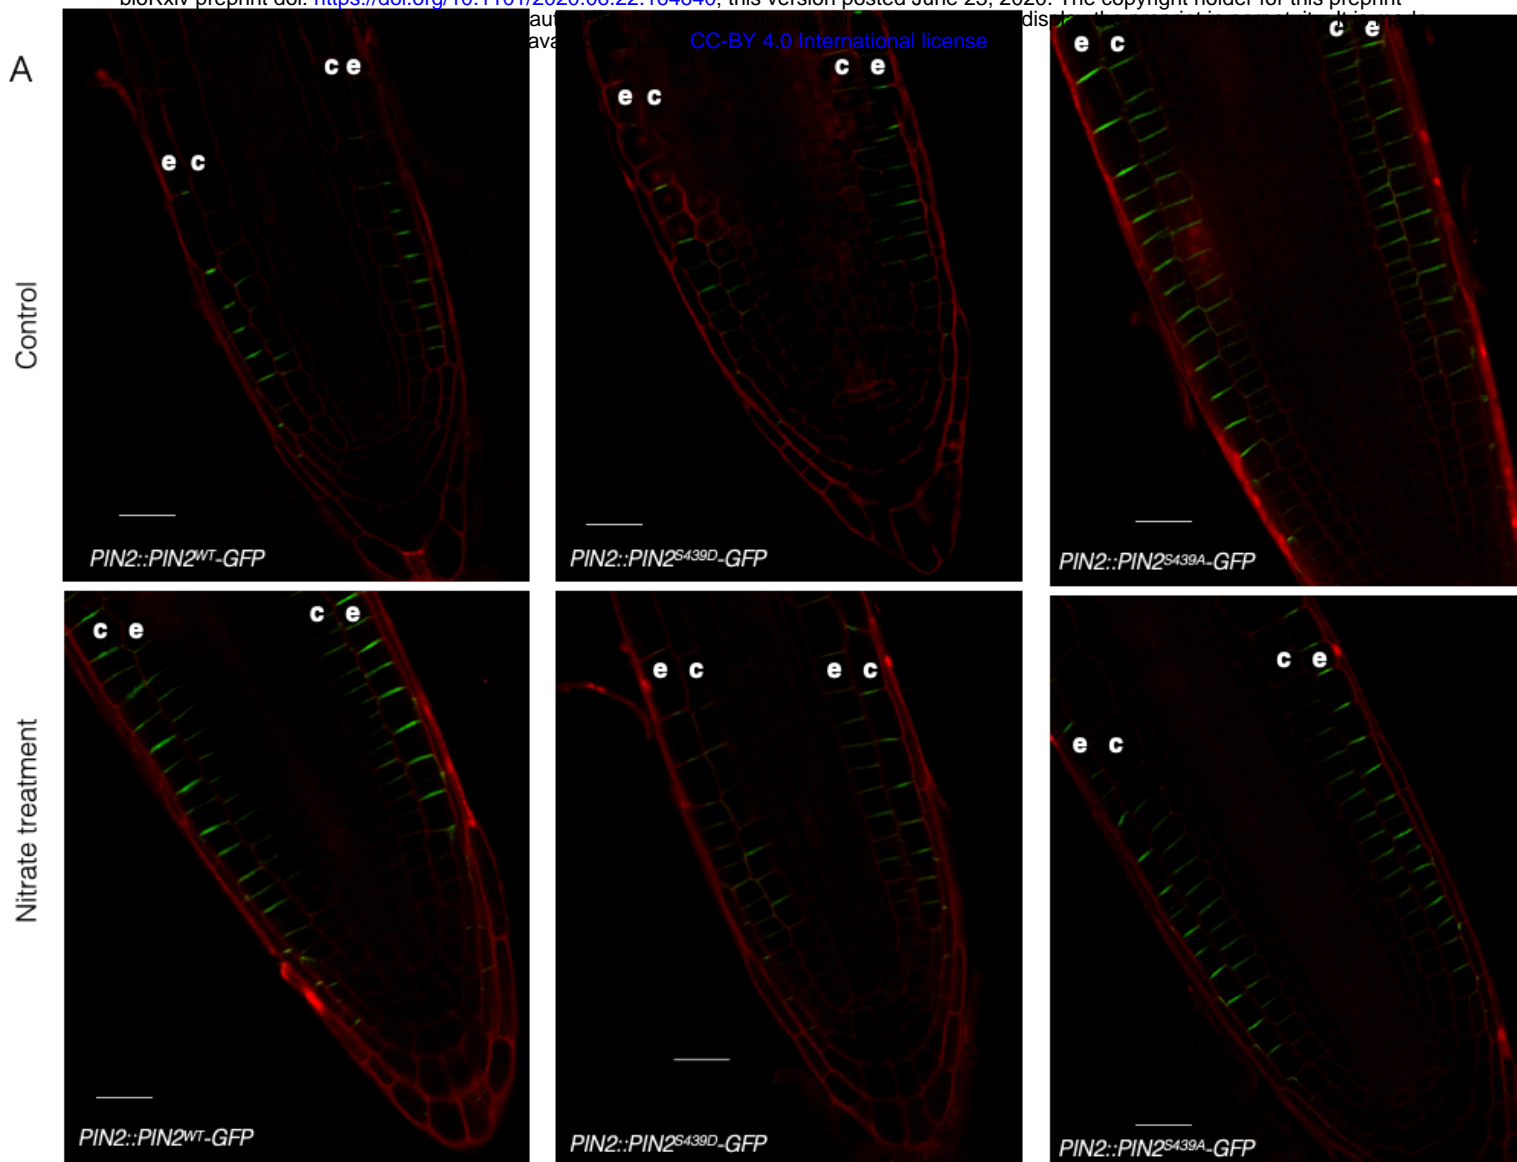

**B**

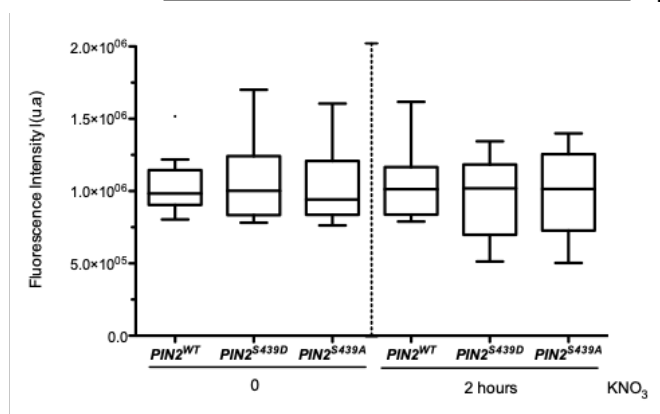

**C**

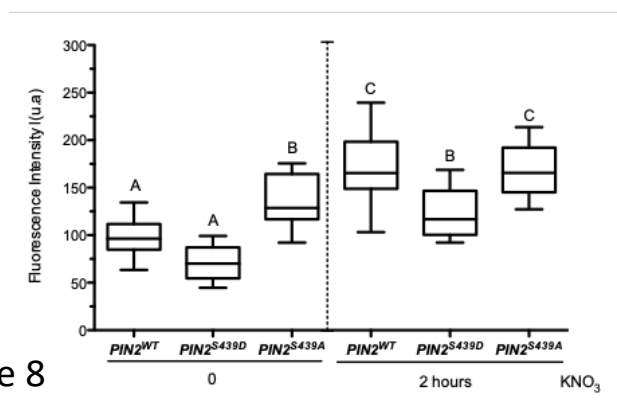

**D**

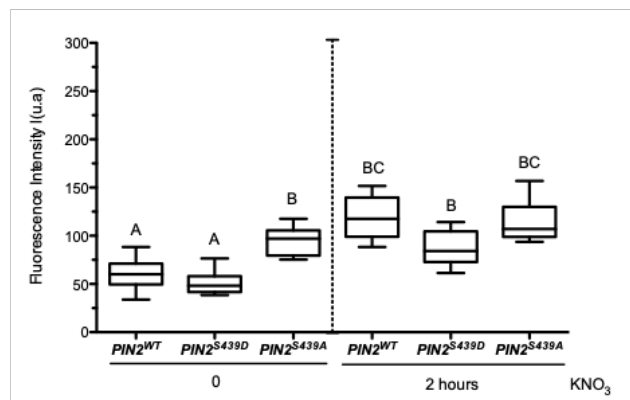

Figure 8

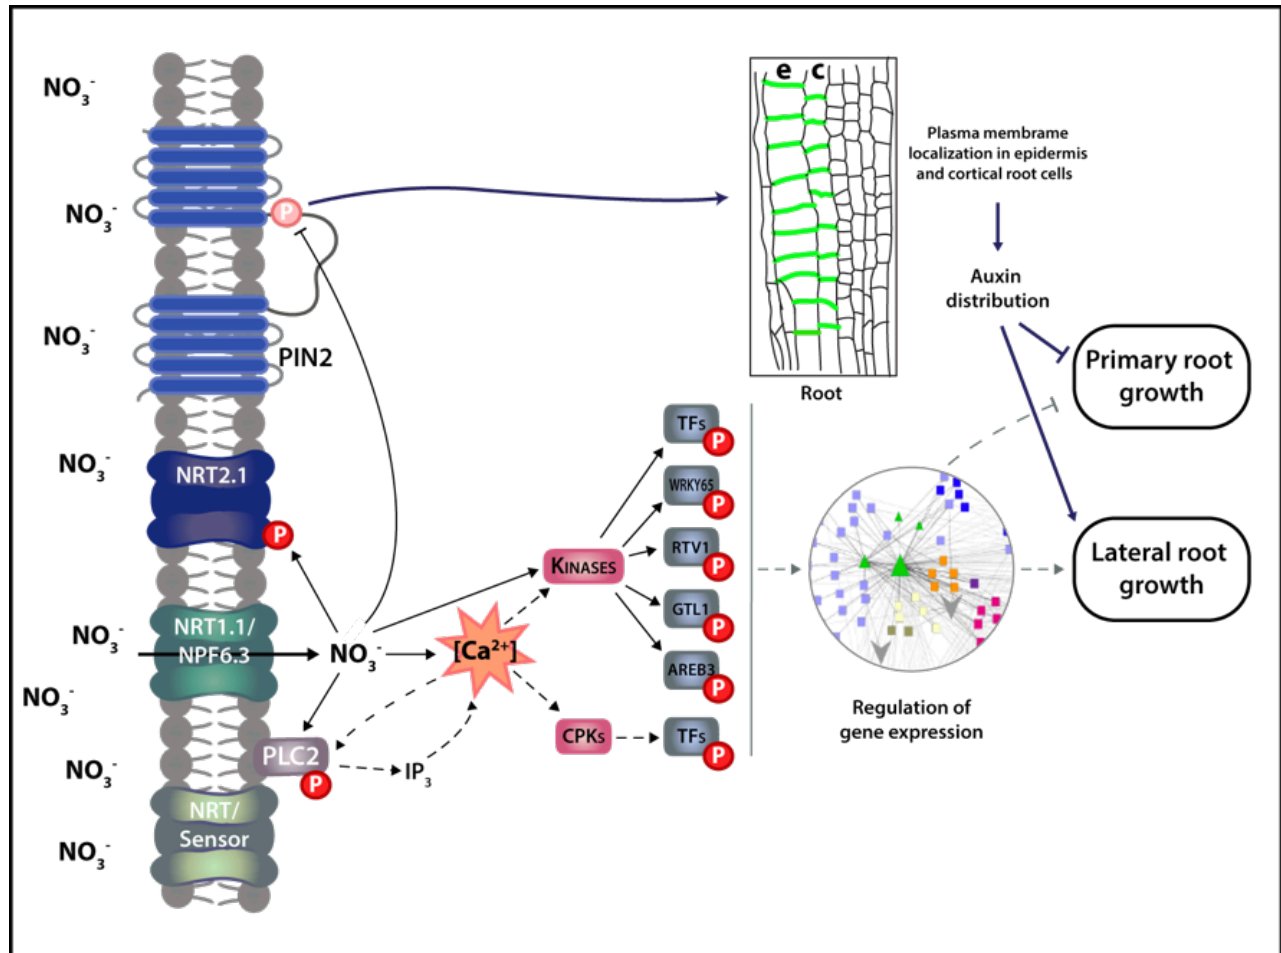

Figure 9

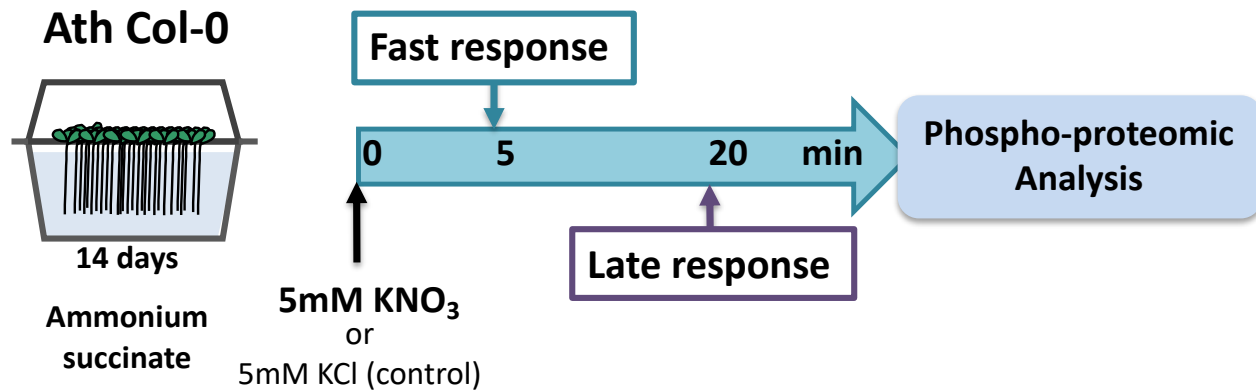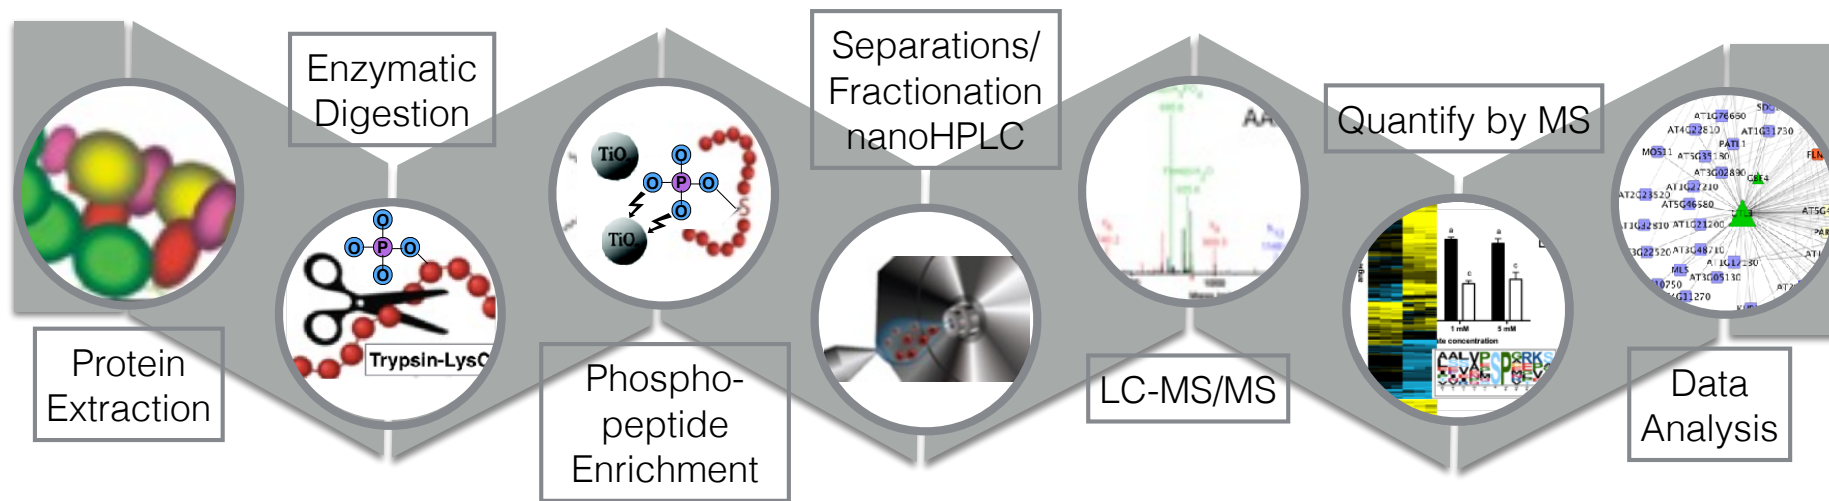

Figure S1

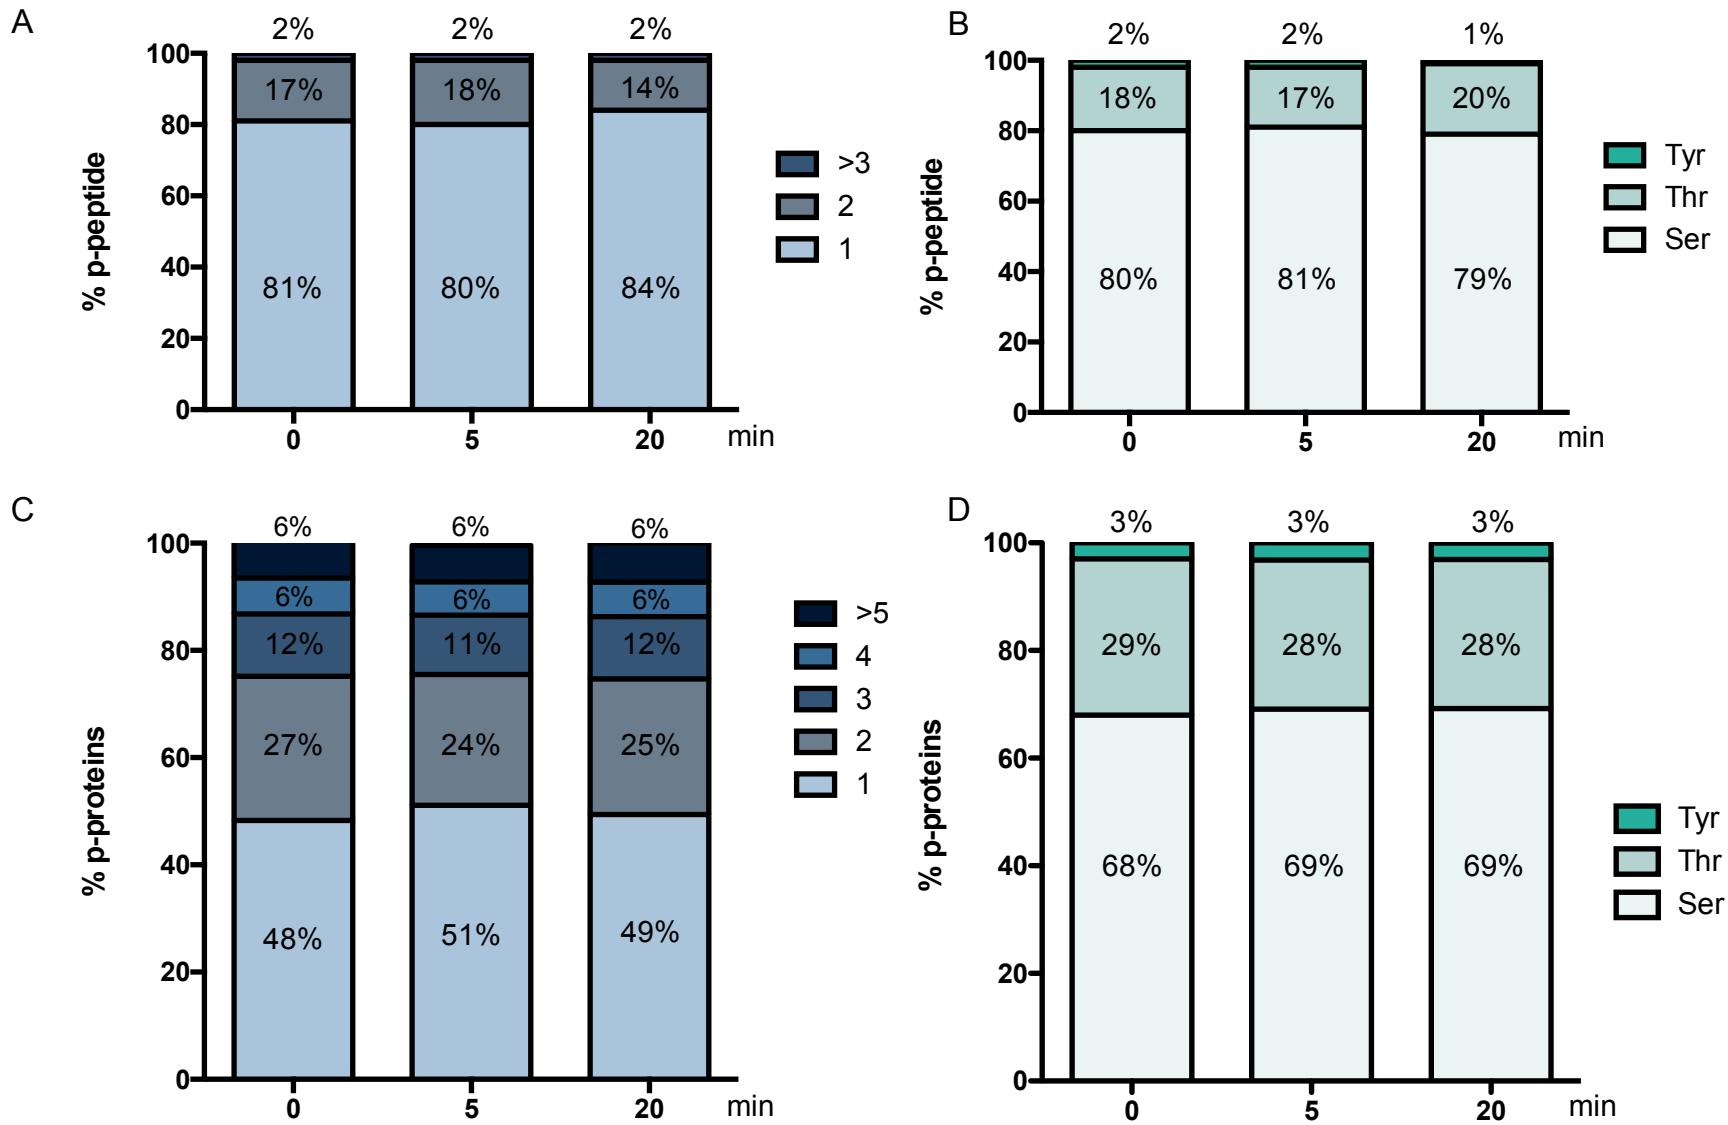

Figure S2.

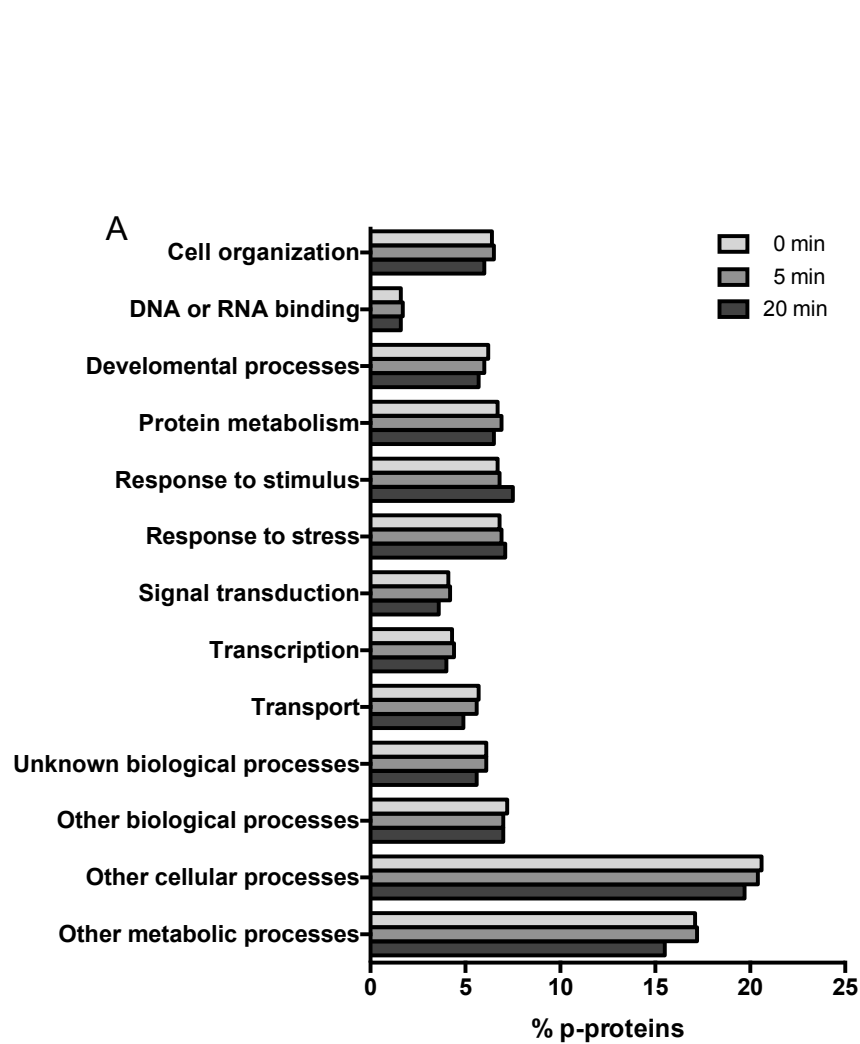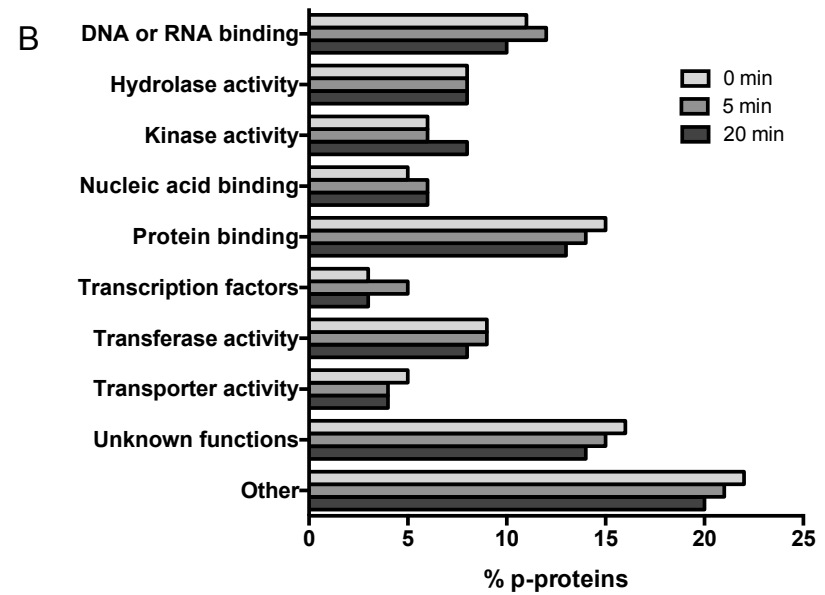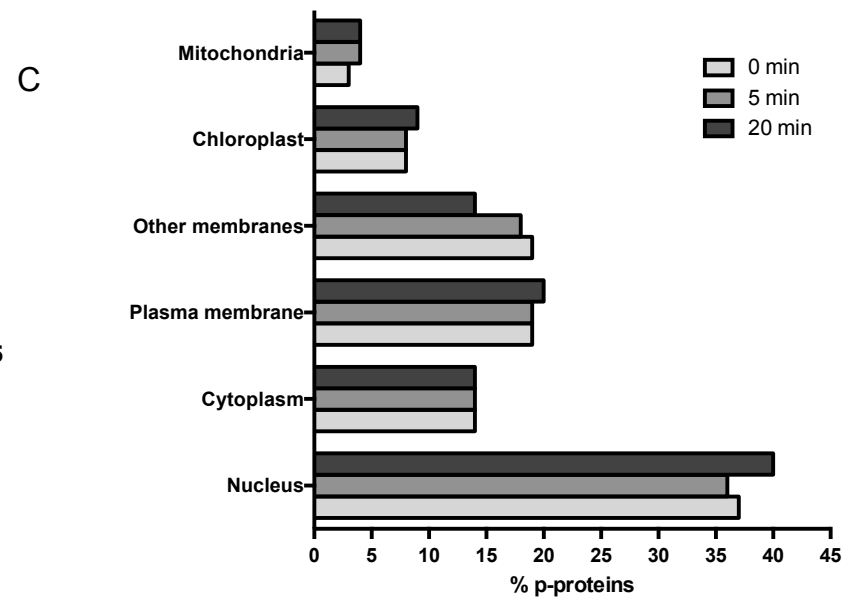

Figure S3.

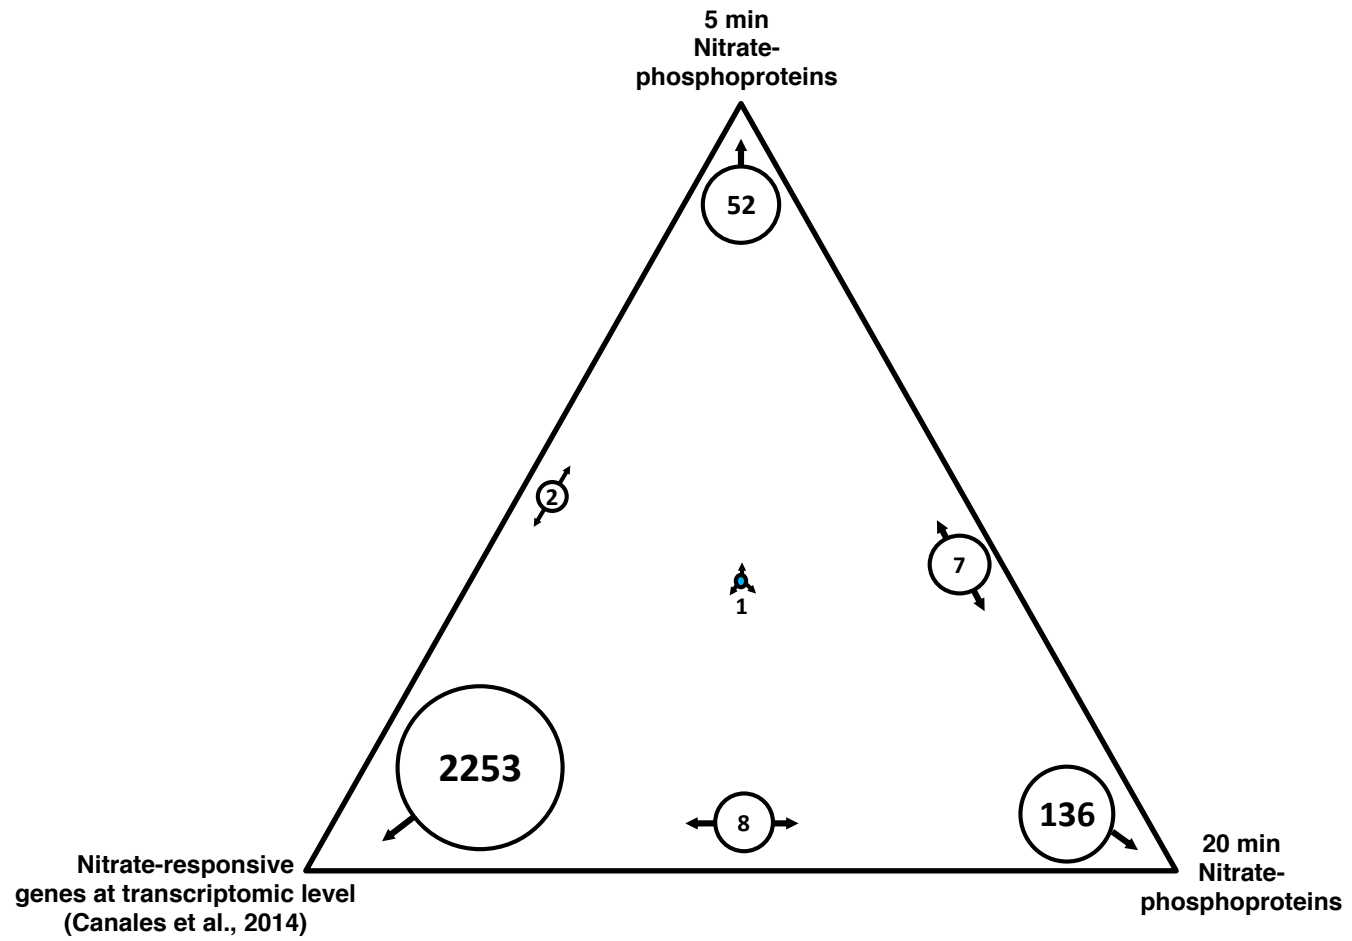

Figure S4.

A

Motif Logo

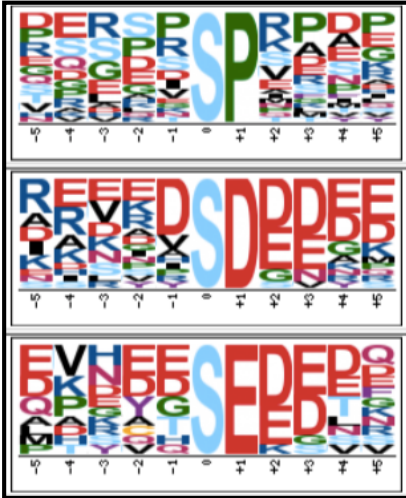

B

Motif Logo

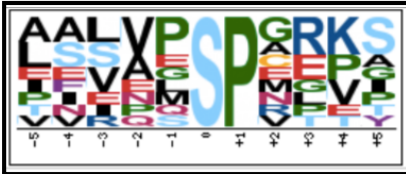

C

Motif Logo

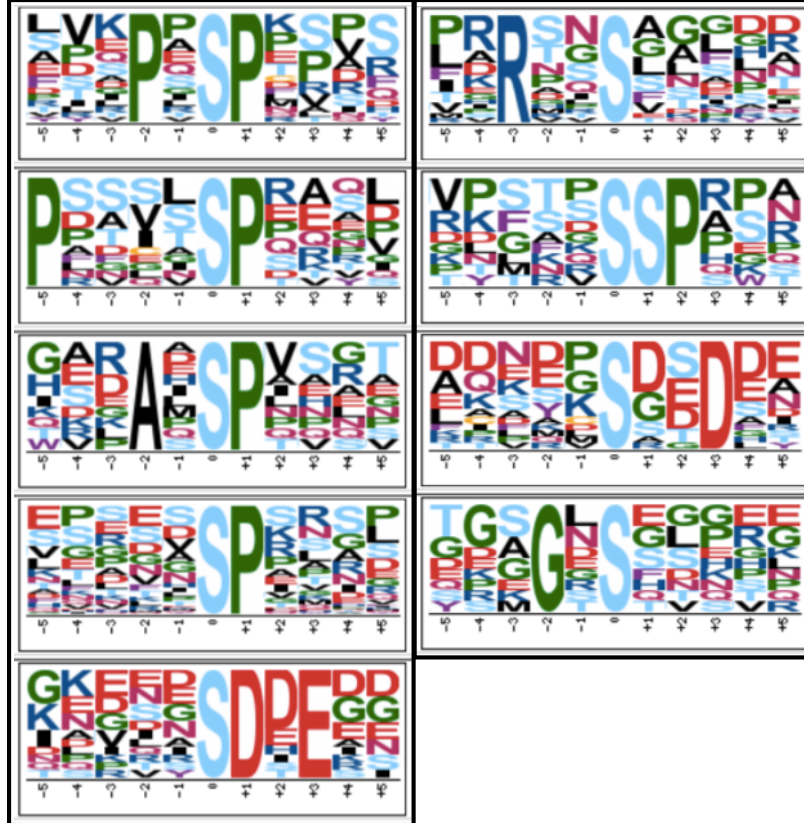

D

Motif Logo

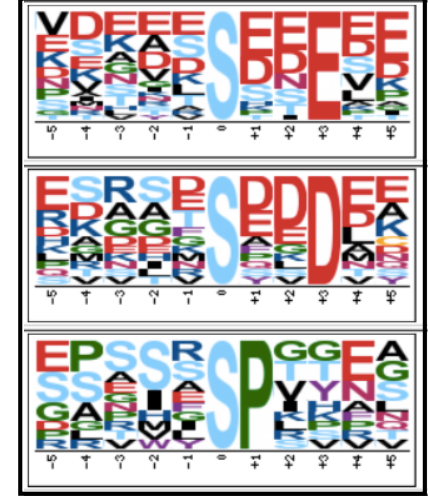

Figure S5

A

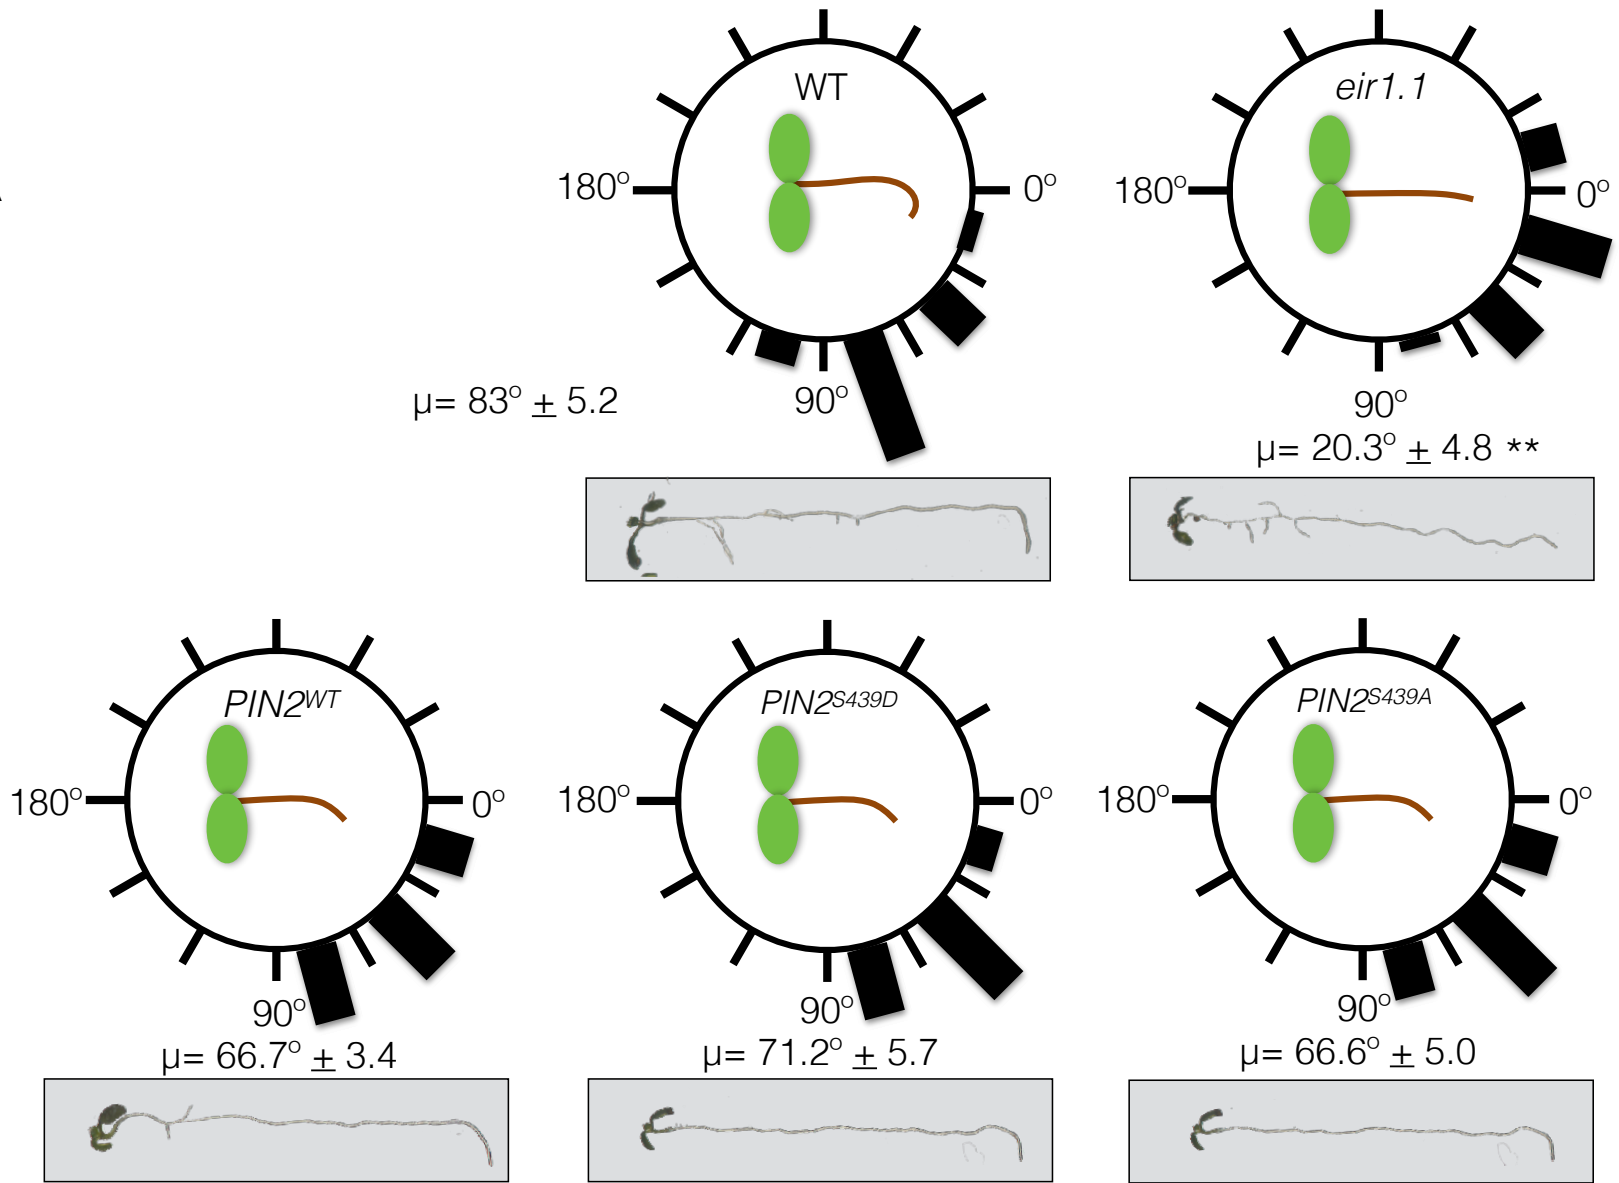

Figure S6.



B

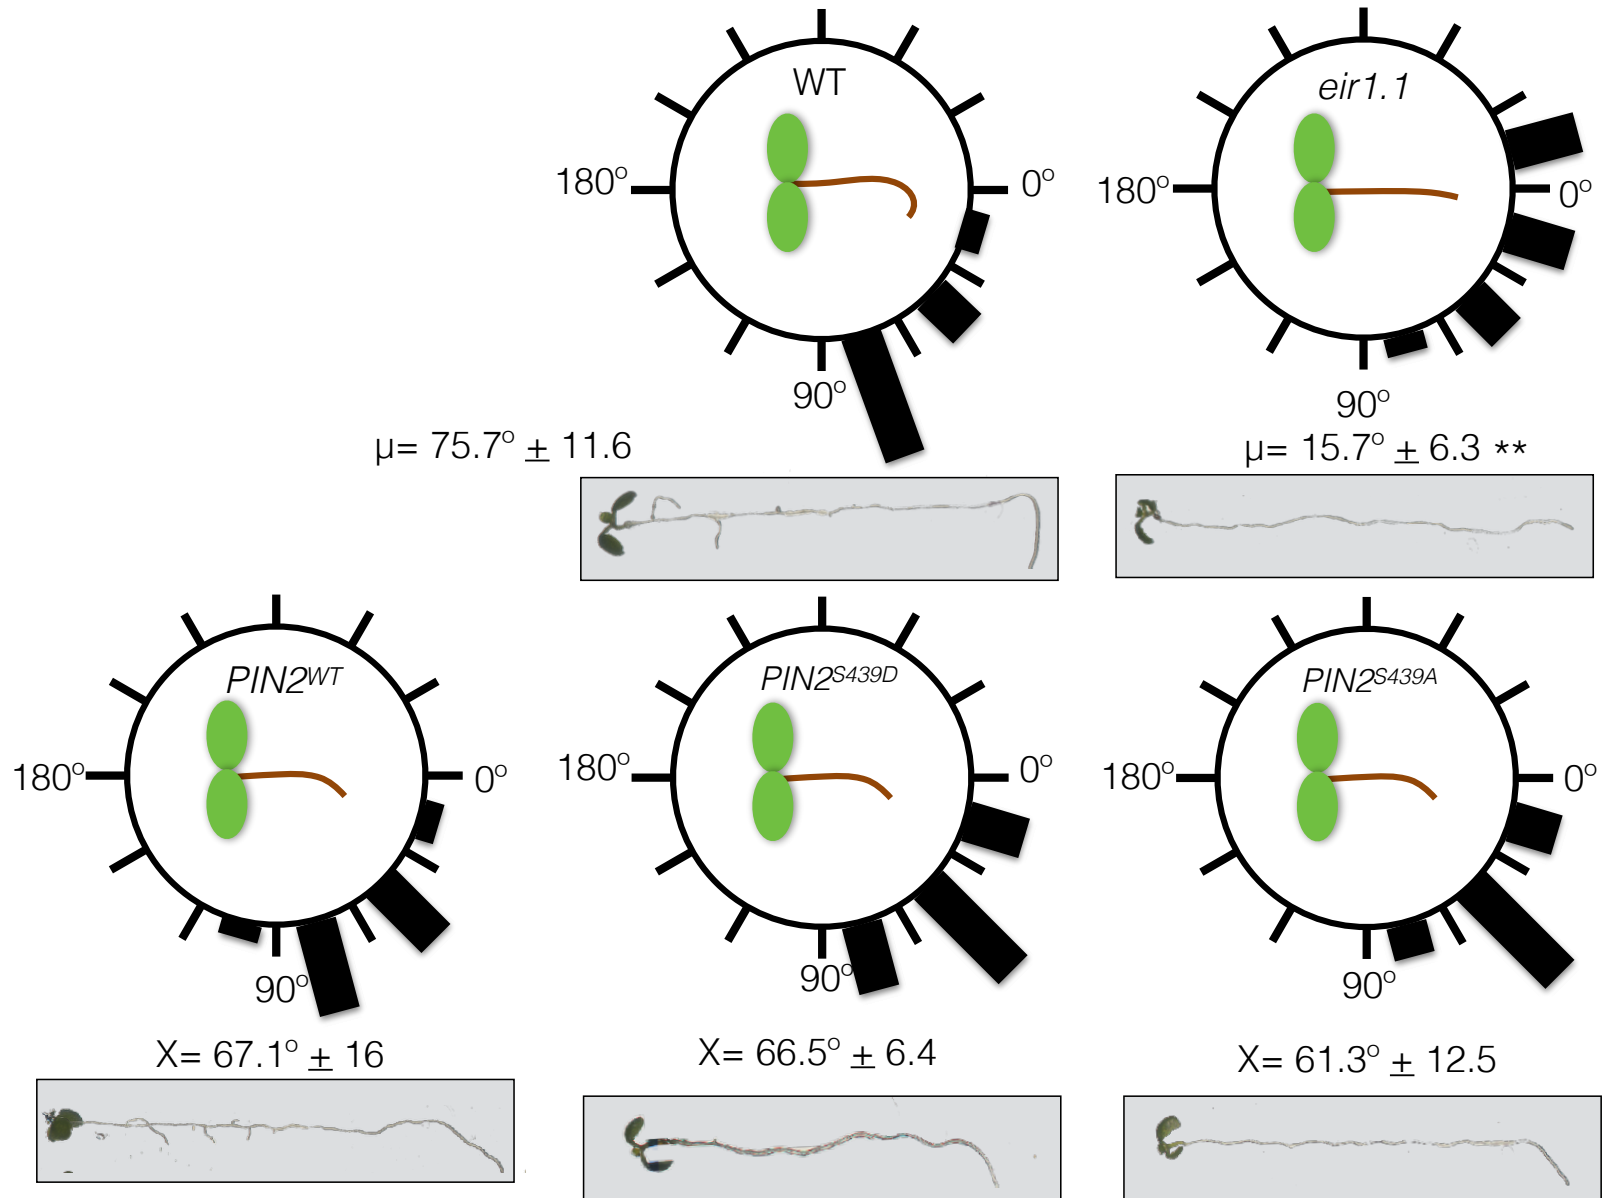

Figure S6.
